# Supplementary material for: Chronic debilitation in stranded loggerhead sea turtles (Caretta caretta) in the southeastern United States: Morphometrics and clinicopathological findings
Source: PubMed Central journal article supplement (PMC6039040; doi:10.1371/journal.pone.0200355), 2018-07-10
Supplement: pone.0200355.s009.pdf [file pone.0200355.s009.pdf]

# STANDARDIZED PROTOCOLS FOR EVALUATING DEBILITATED LOGGERHEAD SEA TURTLES (*Caretta caretta*)

## I. BACKGROUND AND RATIONALE

In 2003, there was a perceived increased occurrence of emaciated and barnacle-laden loggerhead turtles (*Caretta caretta*) found stranded (both dead and moribund) along the southeastern US Atlantic coast. To investigate this situation further, the Wildlife Conservation Society's St. Catherines Island (SCI) Wildlife Survival Center (WSC) and the Georgia Department of Natural Resources organized a workshop on SCI in November of 2003. Fifteen people attended including: turtle biologists from Florida, Georgia, South Carolina, and North Carolina, veterinarians, toxicologists, immunologists, and representatives from the National Oceanic and Atmospheric Administration (NOAA).

The group determined that there was an increasing trend in strandings of debilitated sea turtles from 1992-2002 (approximately 11% annual increase). The number of debilitated turtles appeared to increase substantially in 2003 (NC 3%, SC 22%, GA 10%, and FL 22% of the total turtle strandings). The species composition of debilitated sea turtle strandings was primarily loggerheads, but a few green (*Chelonia mydas*), Kemp's ridley (*Lepidochelys kempii*) and possibly in Florida, a hawksbill (*Eretmochelys imbricata*) turtles were affected. Temporally, the stranding of debilitated turtles occurred all year in Florida; however, strandings were found to be concentrated in the spring and summer (April through July) in the other states. Spatially, debilitated sea turtles were stranded across the southeastern US coastal region, however, there were areas of high stranding density in the southern part of North Carolina, the northern part of South Carolina (Georgetown and Horry Counties) and around Cape Canaveral in Florida (Brevard County). Many explanations for stranding patterns were discussed including ocean currents, winds, and cold-stunning events.

A debilitated turtle was defined as emaciated with small barnacles covering the skin. The flippers may also have lesions or may be necrotic. While heavy epibionts can be a normal finding on the carapace and plastron of healthy loggerhead sea turtles, the skin is generally free of these commensals. Health assessment and necropsy data from these cases indicated the turtles were being affected by a wide range of secondary bacterial and parasitic infections with the primary cause still to be determined. Seven debilitated turtles showed significantly higher blood levels of polychlorinated biphenyls (PCBs) and organochlorine pesticides compared to 47 apparently healthy turtles. In a separate study, mercury concentrations in blood and scutes were 2 to 3 times higher in dead stranded turtles compared to live, apparently healthy turtles although the sample size was small. It is still unclear at what levels these compounds become toxic to sea turtles. The high contaminant levels could be a secondary effect as debilitated turtles use up their fat reserves, causing organic contaminants to become concentrated in blood.

The group determined several areas that need to be addressed in 2004. First, a complete statistical analysis of debilitated sea turtle stranding trends (NMFS-Sea Turtle Stranding and Salvage Network Database) is needed to better define the extent of the problem. This analysis will assist in determining if there was a substantial and statistically significant increase of stranded debilitated turtles in 2003. Possibly the strandings correlate with overall increases in offshore populations. Ongoing studies at the St. Lucie Power Plant in Florida, indicate a significant increase in loggerhead sea turtle populations. The average annual captures of this species from 1992 to 2002 was 275 turtles, while in 2003, 538 turtles were captured. Stranding reporting protocols will be reviewed to ensure that debilitated turtle strandings can be accurately assessed. In the past, not all strandings were examined for signs of debilitation. Thus the percentage of debilitated turtles should be expressed as a proportion of turtles examined, not total strandings. A second goal of this project is to standardize the health assessment performed on all of these turtles and store the data in a central location. And, thirdly, this study will further address contaminant and health data throughout the recovery of these debilitated turtles.

## II. INTRODUCTION TO PROTOCOLS

In order to provide consistent, standardized documentation on stranded debilitated turtles, we have developed the following protocols which include: visual assessment, physical examination, morphometrics, clinical pathology, contaminant analysis, immune function tests, gross necropsy and histopathology. The accumulation and comparison of standardized health parameters will be critical in evaluating debilitated loggerhead sea turtles (*Caretta caretta*) and the cause(s) of their stranding.

Data may not be immediately available from banked samples or samples for contaminant analysis, because funding has not been allocated to this project and some of these analyses are extremely labor-intensive and costly (~\$1000/sample). The samples will be stored properly by Jennifer (Keller) Lynch at NIST in expectation of future funding.

### Introduction to Kit numbers and Datasheets:

Kits are compiled at MUSC and NIST with pre-cleaned supplies and supply from specific lot numbers. Kits for **live** debilitated turtles will be labeled as follows. For example, **DT-SC-R-1A** will be a debilitated turtle (DT) stranded in South Carolina (SC) that is alive (going to R for rehabilitation) and is the first live turtle sampled for this project (1). The A denotes the initial sampling event for that turtle. Kits **DT-SC-R-1B**, **DT-SC-R-1C**, and **DT-SC-R-1D** will be provided to the rehabilitation center for follow-up sampling.

Kits for sampling turtles during **necropsy** will be labeled similarly. For example, **DT-SC-N-1** will be a debilitated turtle (DT) from South Carolina (SC) that is sampled during necropsy (N) and is the first dead turtle (1) sampled for this project. Kits for control turtles will be labeled as **CTN-SC-1**.

Please follow this protocol. Once you are familiar with the details, you may find that the flow charts are helpful. Please fill out datasheets completely which are included in each kit.

### Outline of protocols

| <b>Subsection</b>                                     | <b>Page</b> |
|-------------------------------------------------------|-------------|
| Shipping and contact information                      | 3           |
| Case definition and documentation                     | 4           |
| Live debilitated turtle protocols                     | 5-9         |
| Supplied materials                                    | 5           |
| Initial sampling procedures                           | 6-9         |
| Blood protocol                                        | 6-7         |
| Blood collection                                      | 6           |
| Blood contingency protocol                            | 7           |
| Blood handling                                        | 7           |
| Blood shipping                                        | 7           |
| Scute scraping                                        | 8           |
| Fecal sampling                                        | 8           |
| Epibiota sampling                                     | 8           |
| Biopsy lesions/masses                                 | 8           |
| Skin biopsy for genetics                              | 9           |
| Follow-up sampling procedures                         | 9           |
| Recovering sampling                                   | 9           |
| Recovered sampling                                    | 9           |
| Necropsy protocol for debilitated and control turtles | 10-32       |
| Necropsy sites                                        | 10          |
| Toxicology sampling procedures                        | 11-13       |
| Gross necropsy protocol                               | 13-14       |
| Parasitology sampling                                 | 14-15       |
| Epibiota sampling                                     | 15          |
| Genetic sampling                                      | 15          |
| Necropsy Report                                       | 16-33       |

**III. SHIPPING AND CONTACT INFORMATION FOR BIOMATERIALS COLLECTION**  
**[Contact information was provided in protocol, but has been removed for publication]**

**Immunology:**

Margie Peden-Adams, PhD  
Marine Biomedicine and Environmental Science Center (MBES)

**Toxicology-Mercury (RD) and organochlorines (JK):**

Jennifer (Keller) Lynch or Rusty Day  
NIST-Charleston Laboratory  
Hollings Marine Laboratory

**Parasitology:**

Dr. Ellis Greiner, PhD  
Dept of Pathobiology  
College of Veterinary Medicine  
University of Florida

**Veterinarians:**

Terry M. Norton, DVM, Diplomate ACZM  
Wildlife Conservation Society  
St. Catherines Island Wildlife Survival Center

Al Segars, DVM  
South Carolina Department of Natural Resources  
Marine Division

Craig Harms, DVM, PhD, Diplomate ACZM  
North Carolina State University  
Center for Marine Science and Technology

Blood samples must be shipped out on the same day as collected and arrive within 24-36 hours after collection. Please contact Margie to make arrangements. This is **especially important** for shipping samples out on Fridays.

#### IV. Case definition for debilitated loggerhead sea turtles stranded live and dead.

Current terminology includes "barnacle bill," "living dead," and "severely debilitated." These terms include turtles that are emaciated, barnacle encrusted (carapace, plastron and skin), lethargic/non-responsive, and/or have skin/shell/underlying muscle necrosis and sloughing. Nonspecific terminology may encompass multiple syndromes, or represent a common end stage of multiple initiators, making comparisons between regions and years problematic. A broad case definition must be used initially, but linked with collection of data that can refine case definition in future investigations.

##### Minimum criteria:

- Grossly apparent emaciation--concave junction between neck and nuchal carapace with neck extended
- Concave plastron
- Sunken eyes
- May include severe edema (fluid accumulation under the skin) or ascites/anasarca (fluid accumulation in the coelomic cavity) masking signs of emaciation.

##### Accessory criteria:

- Extensive barnacle and other epibiota coverage and distribution
- Necropsy findings supportive of failure to feed (empty gastrointestinal tract, full gall bladder, fat depletion, serous atrophy of fat)
- Clinical pathology findings supportive of failure to feed may include some or all of the following: hypoproteinemia, hypoalbuminemia, low blood urea nitrogen (BUN), low blood glucose, and/or anemia.

##### Photos and Morphometrics:

- Because degree of emaciation and epibiota coverage are subjective judgments that could vary between observers, means to make objective comparisons must be pursued. Standardized digital photographs should be taken and collected centrally to assess epibiota load, degree of emaciation, and degree of skin sloughing if present. Use the provided **index card** to identify the turtle and include the following views:
  - **perpendicular views of:**
    - **entire carapace (dorsal-ventral)**
    - **entire plastron (ventral-dorsal)**
    - **head/foreflippers/cranial carapace (dorsal-ventral)**
  - **45 degree angle view of:**
    - **midsagittal craniocaudal view of head, neck and cranial carapace**
  - **lateral perpendicular view of side of head (right side for standardization)**
- **Send digital images to Dr. Terry Norton** at the email or mail address provided. Please use regular sized CD when sending images.
- Standardized morphometrics (SCL, CCL, SCW, CCW, depth/height, weight) should be taken to define the degree of emaciation objectively. Body weight and depth should be obtained whenever possible, as they are essential to any calculation of condition index. In addition to these measurements, take a plastron concavity measurement [***no longer recommended because of possible cardiac puncture***]. With turtle on back, measure distance from straight edge resting on widest point of ventral carapace to midpoint of sunken plastron (see diagram below). **Measurements to be taken can found on the datasheet provided.**

##### Plastron Concavity Measurement:

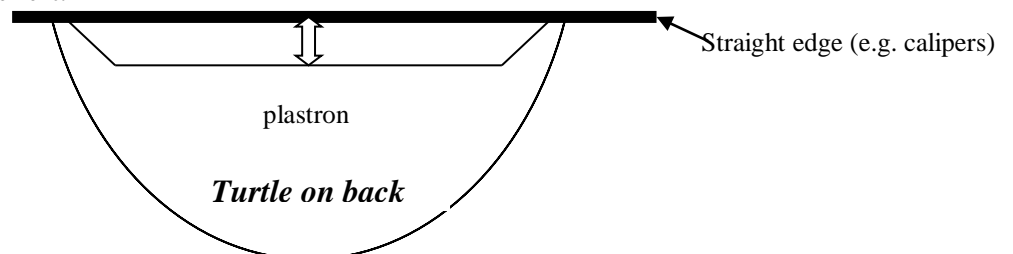

## V. DEBILITATED LOGGERHEAD: LIVE ANIMAL PROTOCOL (Protocols 1&2 on flow charts)

The following diagnostic tools are recommended in all living loggerhead sea turtles encountered that fit the case definition of a debilitated turtle (page 4). If rehabilitation is the goal, then the clinician or rehabilitator responsible for the initial care of the animal will need to decide which samples can be safely taken without compromising the turtle's overall condition. **If the turtle can withstand 39 mL of blood collection, follow this protocol. If not, then please follow the "Blood Contingency Protocol (CP)".** If the turtle is to be euthanized, then please follow the blood sampling protocol described in this live animal protocol prior to administering euthanasia, and then continue with the necropsy protocol.

We would like to receive data on the following parameters, some of which will be performed "in house" or at your preferred laboratory and others will be sent to laboratories specified in the protocols: complete blood counts, plasma chemistry profiles, bacterial blood culture, plasma banking, genetics, immune assays, contaminant analysis, fecal parasite analysis, and biopsy and histopathology of suspicious lesions or masses. In addition, perform a complete physical examination and morphometric measurements, record current/relevant environmental conditions and trends in prey availability/ lack thereof in your region using the data collection form provided. Contaminants to be measured in certain samples are listed in Table 1 on a subsequent page.

### **Supplied Materials:**

A sampling kit will be provided containing the following for each turtle and for each time point. The kit contents will include:

1. Alcohol swabs (2)
2. Vacutainer 21 gauge double-ended needles (3)
3. Vacutainer blood collection tubes (7 pre-labeled and numbered by collection order)
4. BBL Septi-check blood culture tube (1) – some kits will not have this tube, if not, please **request blood culture tubes directly from Antech so that you have the tubes prior to any debilitated turtle stranding.**
5. Slides for making blood smears (4)
6. Slide holders (1 for Antech, 1 for Al Segars)
7. Plastic pipettes (3)
8. Corning cryovials for plasma from tube #5 ("BV", "BAPE", "BANK", "TEST") and tube #6 (plasma= "CHEM"; whole blood= "heparinized whole blood")
9. Vial containing lysis buffer for blood from tube #7 (1)
10. Bubble wrap
11. Disposable stainless steel 6 mm biopsy punch (2)
12. Pre-labeled polyethylene sample bag for scute scraping
13. Pre-labeled ziploc bags for fecal sampling (3)
14. Pre-labeled vials with formalin for epibiont samples (3)
15. Data Sheet
16. Pre-labeled index cards to use in photos for turtle ID
17. Shipping containers with return FedEx labels to Margie Peden-Adams (1), Antech (2), and Ellis Greiner (1)

A kit to be used between animals will also be provided and will contain:

1. Sharpie markers
2. Plastic scrubbing pad and plastic scraper (clean with 10% bleach or another appropriate disinfectant between each turtle)
3. Cleanroom wipers
4. Squirt bottle with high purity isopropanol
5. Squirt bottle with high purity water
6. Vials with formalin for lesion/mass biopsy
7. Shipping container with return FedEx label to Al Segars and Terry Norton for end of season samples
8. Antech forms with "Test Express" and proper tests selected
9. Gel packs (5 per turtle) – **FREEZE THESE UPON RECEIVING KITS**

**Initial Sampling (Kit A):** Please follow the protocols described below for blood collection, scute scrapings, fecal sampling, biopsies, and epibiota sampling. Also, please fill out a datasheet. **Blood sampling from Kit A should also be performed on debilitated turtles prior to euthanasia.**

**Blood:** Blood should be drawn as soon as practical and prior to any therapy. Blood should be drawn through a **double-ended needle** directly into the blood tubes ***in the order in which they are labeled***. The order is important to minimize stress-related effects on immune function and to avoid trace element contamination.

Performing a complete blood count (CBC) and a plasma chemistry panel at this time is recommended. Packed cell volume, total protein, blood glucose, and any other abnormal parameters found on the initial sample should be performed once weekly. For consistency, we request that you use the following protocol and submit your samples to Antech Diagnostic Laboratory (AE160 Comp. Reptilian Profile and M060 Blood Culture). You have been sent submission forms and the charges will be billed to the project account. If you use your own institutional forms, the charges will be billed to your institution. Antech samples must be shipped by FedEx, and not by your local courier. Antech provides prepaid shipping containers and labels. If you use an alternative lab (not the preferred method), please note on the datasheet the lab being utilized and methodology used. We request that your blood analysis include: CBC, total protein, albumin, globulin, uric acid, BUN, Glucose, CPK, AST, Calcium, and Phosphorus.

**Blood Collection:**

1. Disinfect the neck first with betadine and then alcohol, beginning at venipuncture site and working outward. Allow the site to dry.
2. Collect blood using a double-ended needle in this order, gently inverting each tube five times after collection:

- #1: 7mL glass green-top tube (Na heparin in 2004 and lithium heparin in 2005): Full 7mL (immune function, metal analysis)
- #2: 5mL glass green-top tube (Na heparin): Full 5mL (metal analysis)
- #3: 5mL glass green-top tube (Na heparin): Full 5mL (organic contaminants)
- #4: 5mL glass green-top tube (Na heparin): Full 5mL or disregard if it will compromise the animal (organic contaminants)
- #5: 5mL glass green-top tube (Na heparin): Full 5 mL (bile acids, plasma protein electrophoresis, biliverdin, bank, metal analysis)
- #6: 5mL glass green-top tube (Na heparin): Full 5 ml (blood count, plasma chemistries, testosterone, metal analysis)
- #7: 3mL glass red-top tube (no additive): At least 0.5-1 mL unless a skin biopsy is taken (genetics)

Collect blood for bacterial culture prior to starting antibiotics. The blood culture tube (#8) should be sent to Antech. If not using Antech, check with your diagnostic lab for specific protocols (this will not be paid for by the project). Specimens for bacterial blood culture require collection into tubes provided containing growth medium (BBL, Septi-Chek TSB, Trypticase Soy Broth with SPS and CO<sub>2</sub>). These tubes are available through Antech. Antech will process 1 tube for both aerobic and anaerobic organisms.

**Blood culture collection procedure:**

- A separate venipuncture site than above should be disinfected twice with an iodine preparation and then alcohol, beginning at venipuncture site and working outward. Allow the site to dry.
- Disinfect the rubber stopper of blood culture tube with alcohol.
- Collect 3 ml of blood into culture tube (vacuum in tube should fill to this level). Hold culture tube at room temperature (or up to 37 °C) until transported/ shipped to lab.

**Blood Contingency Protocol (CP) Collection:**

If the turtle cannot withstand 39 mL of blood collection, then at the minimum collect the following tubes using a double-ended needle in this order and gently invert each tube 5 times after collection:

7mL Green-top tube #1: Full 7mL (immune function, OC analysis, metal analysis; LiHeparin 2005)

5mL Green-top tube #2: Full 5 mL – to replace tubes #2,5,&6 (bile acids, plasma protein electrophoresis, biliverdin, testosterone, bank, metal analysis, blood count, plasma chemistries)

Blood culture tube #8: After disinfecting new prep site.

**Blood Handling:**

1. Before blood clots, transfer whole blood from tube #7 (if collected) into a vial of lysis buffer via clean, unused pipette. Gently invert this vial several times.
2. Record approximate volumes collected in each tube on datasheet.
3. Store tube #8 at room temperature.
4. Keep all other tubes cool in a refrigerator or on wet ice until processed. If using wet ice, wrap tubes in bubble wrap or use another barrier (i.e. a styrofoam cup) to keep them from directly touching the ice in order to minimize hemolysis.
5. Gently invert tube #6 (or tube #2 in CP) five times. Make 4 blood slides: 2 for Antech and 2 for Al Segars (later shipped to Nicole Stacy). Allow slides to dry and store in slide holders and label holders with the date.
6. Transfer 0.3 mL whole blood from tube #6 (tube #2 in CP) via clean, unused pipette to cryovial labeled “heparinized whole blood”. Recap tube #6 (tube #2 in CP). Label cryovial with date and refrigerate.
7. Centrifuge remaining blood in tube #6 and tube #5 (or only tube #2 in CP) for 5 minutes. Label the 5+ cryovials with the date.
8. Transfer 0.6 mL plasma from tube #6 (tube #2 in CP) via clean, unused pipette to cryovial labeled “CHEM.” Transfer remaining plasma to cryovials “TEST” and “BANK.” Ensure that all plasma is removed, recap tube #6 and refrigerate remaining red blood cells.
9. Transfer plasma of tube #5 (tube #2 in CP) via pipette to 3+ labeled cryovials:
  - 0.5 ml into “BAPE” (bile acids and protein electrophoresis)
  - 0.2 ml into “BV” (biliverdin)
  - remainder into cryovials labeled “BANK” (banking) – fill equally
10. Ensure that all plasma is removed from the red cells in tube #5, recap tube #5, and refrigerate remaining red cells.

**Storage prior to shipping:**

11. Refrigerate: tube #1-4; remaining red cells in tube #5-6; blood lysis vial; cryovials labeled “heparinized whole blood,” “CHEM,” “BAPE,” “BV,” “TEST,” and “BANK.”
12. Room temperature: blood slides, blood culture tube #8.

**Shipping (same day):**

13. Contact **Margie Peden-Adams** on the same day of collection. Place plasma cryovials (“BAPE,” “BV,” “TEST,” “BANK”); scute scrapings (see protocol below); and blood lysis vial or skin biopsy at the bottom of the shipping container. Place frozen gel packs directly on top of these samples. Wrap blood tubes #1-6 in bubble wrap so that tubes are not touching each other and place them on top of the gel packs. Place 2 of the blood slides “Al Segars” at the top of the container. Ship by FedEx overnight to Margie Peden-Adams.
14. Ship the cryovials labeled “heparinized whole blood” and “CHEM”, 2 blood slides (“Antech”) and the blood culture tube #8 (place this tube farthest away from the gel pack) by FedEx overnight to **Antech** with a frozen gel pack.

**Scute scrapings:** The scute scraping should be performed as soon after the blood collection as is practical. The scute scraping should be collected, stored, and shipped with the initial blood sample and will only be taken at the initial sampling phase (kit A only). The scute sample must be collected from the outermost edge of the eight most posterior marginal scutes of the carapace. Scutes free of fouling organisms/epibiota should be targeted for sampling.

1. Scrub 2 cm or more of carapace dorsal and ventral to the edge of these scutes vigorously with plastic scrubbing pad to remove sloughing keratin. If there are no areas free of epibiota, use the plastic scraper to clear the target area as thoroughly as possible prior to scrubbing.
2. Rinse the scrubbed area with high purity distilled water and isopropanol provided in the kit.
3. Remove remaining foreign matter and debris using clean room wipers, distilled water and isopropanol.
4. Hold a polyethylene sample bag under the prepared area.
5. Remove the lateral edge of the prepared marginal scutes by moving a disposable stainless steel biopsy tool parallel to the edge being sampled, allowing the shavings to fall directly into the polyethylene sample bag. Typically the posterior lateral corner of each scute will yield the thickest sample without penetrating the keratin and contaminating the sample with untargeted tissue. This should yield small shavings or splinters of keratin ~ 1 mm in thickness totaling 0.2-0.5 g. (Target approximately 4 inches or 10 cm total of 1 mm thick shavings).
6. Label the outside of the bag with the date.
7. Keep this sample cool in a refrigerator or on wet ice and ship with the blood samples on frozen gel packs.

**Fecal samples:** A fecal sample for parasitology should be taken opportunistically prior to deworming (kit A) and at the end of rehabilitation prior to release (kit D).

1. Collect small amount feces (~one tablespoon) and place in a Ziploc bag. It is appropriate to collect feces from the water if there is still some consistency to it.
2. Double-bag sample and label both Ziploc bags with the date.
3. Place fecal sample in cooler on ice or in refrigerator (do not freeze!).
4. Ship sample with frozen gel packs (place the double-bagged sample into a 3<sup>rd</sup> Ziploc bag that contains the ice pack) via FedEx 2 day mail to Dr. Ellis Greiner within 7 days.

**Epibiota samples:**

1. Collect representative species and samples of epibiota from plastron, carapace, and skin.
2. Place in 3 separate vials (one for each location: plastron, carapace, skin) with 95% ethanol (preferred) or isopropyl alcohol and store at room temperature.
3. Ship to Terry Norton at the end of the season (November).

**Biopsy/histopath of suspicious lesion or mass:**

1. Label formalin vial with identification number of turtle and specific location of mass/lesion. Please obtain photograph (preferably digital, labeled with animal ID, date, and stranding location) of lesion/mass/biopsy.
2. Provide a brief description of lesion on the datasheet and other pertinent history of case should accompany sample to lab.
3. Representative tissue samples should be less than ¼ inch thick to ensure proper fixation. Proper fixation is important in preserving specimens for histopathologic evaluation. Ideally, tissue should be fixed in a volume of formalin solution 10 times the volume of the tissue for adequate fixation.



4. Send digital images and biopsy specimens to Dr. Terry Norton via regular mail (not paid for by project funds). These samples will be forwarded to Dr. Nancy Stedman for histopathological evaluation. Results will be available to clinician in a timely fashion.

**Skin sample for genetics:**

1. If blood tube #7 was not collected for genetics, collect a tissue sample from trailing edge of flipper via a fresh disposable biopsy punch.
2. This can be done when the turtle is more stable.
3. Store tissue in 95% ethanol at room temperature and label vial with “DT genetics”, turtle ID, date, and stranding location.
4. Ship samples to Al Segars at the end of the season, they will be forwarded to Joe Quattro at University of SC for analysis.

**Follow-up sampling of live debilitated turtles in rehab (Kits B-D):**

**“Recovering Turtle” Samples (Kits B and C):** Blood sampling should be repeated two times during the recovering phase of the animal. Ideally the chosen time points will capture the rate of maximum improvement, not after the animal has substantially improved.

- B. The second samples (kit B) should be taken approximately one week after the turtle *begins to eat* food on its own.
- C. The third samples (kit C) should be taken *within 10 weeks of the second sample and after a small observable improvement* in weight, body condition, behaviors, and clinical data parameters. Do not wait until the animal has fully recovered.

Use the kits labeled B and C with the turtle’s original kit ID number. Follow the blood protocol described above to collect blood tubes #1-6. If the turtle cannot withstand 32 mL of blood collection, then follow the blood contingency protocol described above. Process and ship all samples as described above. No scute, fecal, blood culture, epibiota, or “TEST” samples are requested at these time points (supplies for those purposes are not included in kits B and C). Please fill out a datasheet at each sampling event and include in the shipment of samples. We realize that the second time point is vague and subjective, therefore recording weights, measurements, behavioral observations, and clinical data (i.e. PCV, TP, and other plasma chemistries) throughout the recovering phase will be very important. Please use and keep the “Major Milestones and Clinical Records” datasheet throughout treatment of the animal and include only in the final shipment of samples.

**“Recovered” Sample:** Just prior to release of the animal, repeat the blood, blood culture, and fecal sample collection. Use the kit labeled D with the turtle’s original kit ID number to collect blood (tubes #1-6; 8) and fecal samples. Process and ship all samples as described above utilizing supplies in the kit, including “TEST”. Please send copies of the “Major Milestones and Clinical Records” datasheet to Margie Peden-Adams, as well as any other available information, such as medical treatment and feeding schedules, and records of measurements, behavioral observations, and clinical data.

\*\*\*If the turtle dies during rehabilitation, follow the necropsy protocol – page 10.\*\*\*

**VI. DEBILITATED LOGGERHEAD: NECROPSY PROTOCOL (Protocols 3&4 on flow charts)**

**1) Primary Gross Necropsy Sites:**

- a) Turtles found in **North Carolina** and **northern South Carolina** (Georgetown and Horry counties) may be transported to:
- Dr. Craig Harms  
North Carolina State University  
Or
  - Dr. Greg Lewbart or Shane Christian  
Department of Clinical Sciences  
North Carolina State University  
College of Veterinary Medicine
- b) Turtles found in **southern South Carolina** (Charleston, Beaufort and Colleton) and **Georgia** will be transported to the Georgia Department of Natural Resources in Brunswick, GA or arrangements can be made through Dr. Terry Norton to drop off the turtle at St. Catherines Island Wildlife Survival Center dock in Midway, GA. Please contact either:
- Mark Dodd  
Georgia Department of Natural Resources  
Or
  - Dr. Terry Norton  
St. Catherines Island Wildlife Survival Center
- c) For turtles found in **Florida**, contact Terry Norton to discuss appropriate necropsy sites.

## 2) Toxicology Protocol for Collection of Tissues at Necropsy (Protocols 3&4 on flow charts)

**Strategy:** Contaminants to be measured in certain samples are listed in Table 1. Tissue samples will be collected from fresh dead (code 1) or euthanized debilitated turtles during necropsy (Protocol 3 on flow chart). If the debilitated turtle is to be euthanized, then blood samples should be taken using a live turtle Kit A prior to administering euthanasia, and additional blood collected during the necropsy will not be needed. Blood sampling from kit A will need to be processed and shipped out on the same day. If these blood samples were not collected, please collect blood during the necropsy as described below.

We are also in need of samples from **control** turtles: code 1 or euthanized **acute mortalities** (boat strike, entanglement) that appear to be otherwise “**healthy**” turtles (Protocol 4 on flow chart). If the control turtle will be euthanized, collect blood from the dorsocervical sinus using the supplies in the necropsy kit (not kit A). Blood does not need to be sent overnight. Follow the necropsy protocol and collect all tissues, including those for histopathology.

### **Supplied Materials:**

A sampling kit will be provided containing the following for each dead stranded animal:

- Blood collection tubes (4 sodium heparin, glass, pre-labeled and numbered by collection order)
- Vacutainer double-ended needles, 21 guage (2)
- Stainless steel 6mm biopsy punch (disposable)
- 3 Pre-labeled polyethylene sample bags for scute, liver, and brain samples
- 2 pieces of pre-cleaned aluminum foil for fat and liver samples in separate Ziploc baggies
- 1 50 mL tube for additional liver (PFOS) sample
- 3 hexane-rinsed, foil wrapped scalpel handles and forceps
- 1 set of “No Teflon” handles and forceps for the additional liver (PFOS) sample
- Scalpel blades (4)
- Datasheet

A kit to be used between animals will include:

- Plastic scrubbing pad (clean with 10% bleach or another appropriate disinfectant between each turtle)
- Cleanroom wipers
- Squirt bottle with high purity isopropanol
- Squirt bottle with high purity water

**Sampling:** Blood, scute, fat, liver, and brain will be collected using the following protocols. Please collect these samples *prior to removing organs or sampling for other purposes*. Samples should be collected *in the order described* to reduce contamination from other tissue types and external sources. Keep all samples cool in a refrigerator or on wet ice until they can be frozen. Freezing immediately is preferred. Please record all turtle ID information, all sampling problems, and storage locations on the provided datasheet.

**Scute scrapings:** The scute sample must be collected from the outermost edge of the eight most posterior marginal scutes of the carapace. Target scutes within this area that are free of fouling organisms.

1. Scrub 2 cm of carapace dorsal and ventral to the edge of these scutes vigorously with the plastic scrubbing pad to remove sloughing keratin. If there are no areas free of epibiota, use the plastic scraper to clear the target area as thoroughly as possible prior to scrubbing.
2. Rinse the scrubbed area with high purity distilled water and isopropanol.
3. Remove remaining foreign matter and debris using clean room wipers, distilled water and isopropanol.
4. Hold a polyethylene sample bag under the prepared area.
5. Remove the lateral edge of the prepared marginal scutes by moving a disposable stainless steel biopsy tool parallel to the edge being sampled, allowing the shavings to fall directly into the polyethylene sample bag. Typically the posterior lateral corner of each scute will yield the thickest sample without penetrating the keratin and contaminating the sample with untargeted tissue. This should yield small shavings or splinters of keratin ~ 1 mm in thickness totaling 0.2-0.5 g. (Target approximately 4 inches or 10 cm total of 1 mm thick shavings).

6. Label the outside of the pre-labeled bag with the necropsy date. Place the bagged sample inside a second outer bag and include a pre-labeled paper label inside the outer bag.
7. Freeze this sample at -20 °C or below.

**Fat:** Fat may not be available on these debilitated turtles. Occasionally, you may see black flaccid tissue in the inguinal regions where the fat is usually present. This is thought to be remnants of fatty tissue, please sample this if nothing else is available.

- 1) Open a pre-cleaned piece of foil completely, keeping the cleaned inside surface facing up.
- 2) Immediately after removing the plastron, use the provided scalpel blade, hexane-rinsed scalpel handle, and hexane-rinsed forceps to remove a 2 g to 5 g piece of fat from the **left inguinal region**. If little fat is available, take from other areas but note these locations on the datasheet.
- 3) Using the forceps, transfer the fat to the center of the pre-cleaned piece of aluminum foil.
- 4) Fold the foil in half over the tissue and make a closed pouch by folding over the 3 open edges several times onto themselves.
- 5) Place the sample inside a pre-labeled plastic Ziploc bag and label the outside with the necropsy date.
- 6) Freeze this sample at -20 °C or below.

***\*\*Do not reuse this blade, handle or forceps to collect the liver sample.***

**Liver:** Three samples of liver will be collected for different purposes, therefore they must be collected and stored differently. ***\*\*Please don't puncture the gallbladder before taking these samples. And, do not touch the liver surface with plastic gloves or any object before taking these samples.***

1. Open a hexane-rinsed piece of foil completely, keeping the cleaned inside surface facing up.
2. Immediately after removing the plastron, use a fresh, provided scalpel blade, hexane-rinsed scalpel handle, and hexane-rinsed forceps to remove a one inch cube of liver from the **posterior marginal edge of the right lobe**.
3. Using the forceps, transfer the liver to the middle of the opened piece of aluminum foil (liver sample #1, foil).
4. Fold the foil in half over the sample and make a closed pouch by folding the 3 open edges several times onto themselves.
5. Place the foiled sample inside a pre-labeled Ziploc bag.
6. Using the same instruments, collect another one inch cube of liver from near the same location as the first sample.
7. Using the same forceps transfer the tissue to a pre-labeled polyethylene sample bag and seal the bag (liver sample #2, polyethylene bag).
8. Label the outside of both pre-labeled bags with the necropsy date.
9. Using a new scalpel blade with the handle and forceps labeled "No Teflon," collect a one inch cube of liver from the **posterior marginal edge of the left lobe**.
10. Place this sample into the 50 mL tube labeled "PFOS liver" (liver sample #3, 50 mL tube).
11. Freeze all 3 samples at -20 °C or below.

***\*\*Do not reuse these blades, handles or forceps to collect the brain sample.***

**Blood:** If the turtle was euthanized, blood should have already been collected. If not, and the heart is still beating, then:

1. Place one end of the **double-ended needle** into the heart.
2. Collect tubes #1 and #2 (5mL green-top tubes for organic contaminants) followed by tubes #3 and #4 (5mL green-top tubes for metal analysis).
3. Try to get at least 5mL total for each of the two contaminant analyses.
4. Label tubes with necropsy date.
5. Keep tubes on ice, centrifuge them to separate plasma from red blood cells, and freeze them standing upright at -20 °C as soon as possible.

**Brain:**

1. Open the brain cavity carefully to avoid touching the tissue with your instruments.
2. With a fresh, provided scalpel blade, hexane-rinsed scalpel handle, and hexane-rinsed forceps, cut the brain in half laterally. Transfer one half directly to a polyethylene sample bag. The other half of the brain should be saved in formalin for histopathology.

3. Label the outside of the pre-labeled bag with the necropsy date. Place the bagged sample inside a second outer bag and include a pre-labeled paper label inside the outer bag
4. Freeze the sample at -20 °C or below.

**Storage and shipping:**

Store all toxicology samples frozen. Blood tubes cannot be stored at temperatures below -20 °C or they will break. Toxicology samples and datasheets collected at necropsy should be shipped **on dry ice** to Jennifer Keller at the end of the season (November).

**Table 1.** List of contaminants targeted for analysis in certain tissues.

| Total Mercury |              | Other organohalogens |         |                           |                              |          |
|---------------|--------------|----------------------|---------|---------------------------|------------------------------|----------|
| IN:           |              | PCB congeners        |         | Organochlorine pesticides | PBDE congeners               |          |
| <i>brain</i>  |              | PCB 1                | PCB 114 | PCB 177                   | alpha-HCH                    | PBDE 17  |
|               | <i>blood</i> | PCB 8                | PCB 118 | PCB 178                   | beta-HCH                     | PBDE 25  |
|               |              | PCB 18               | PCB 119 | PCB 180                   | gamma-HCH                    | PBDE 28  |
|               | <i>scute</i> | PCB 28               | PCB 121 | PCB 183                   | HCB                          | PBDE 30  |
| PCB 29        |              | PCB 126              | PCB 185 | aldrin                    | PBDE 33                      |          |
| <i>liver</i>  | PCB 31       | PCB 127              | PCB 187 | dieldrin                  | PBDE 47                      |          |
|               | PCB 44       | PCB 128              | PCB 188 | endrin                    | PBDE 49                      |          |
| <b>PFCs</b>   |              | PCB 45               | PCB 130 | PCB 189                   | mirex                        | PBDE 66  |
| PFOS          |              | PCB 49               | PCB 132 | PCB 191                   | <i>cis</i> -chlordane        | PBDE 71  |
|               | PFOA         | PCB 50               | PCB 137 | PCB 193                   | <i>trans</i> -chlordane      | PBDE 75  |
| IN:           | <i>liver</i> | PCB 52               | PCB 138 | PCB 194                   | <i>cis</i> -nonachlor        | PBDE 85  |
|               |              | PCB 56               | PCB 146 | PCB 195                   | <i>trans</i> -nonachlor      | PBDE 99  |
| <i>plasma</i> |              | PCB 63               | PCB 149 | PCB 196                   | heptachlor                   | PBDE 100 |
|               |              | PCB 66               | PCB 151 | PCB 197                   | heptachlor epoxide           | PBDE 116 |
|               |              | PCB 70               | PCB 153 | PCB 199                   | oxychlordane                 | PBDE 119 |
|               |              | PCB 74               | PCB 154 | PCB 200                   |                              | PBDE 138 |
|               |              | PCB 77               | PCB 156 | PCB 201                   | 4,4'-DDT                     | PBDE 153 |
|               |              | PCB 79               | PCB 157 | PCB 202                   | 2,4'-DDT                     | PBDE 154 |
|               |              | PCB 82               | PCB 158 | PCB 203                   | 4,4'-DDE                     | PBDE 155 |
|               |              | PCB 87               | PCB 159 | PCB 205                   | 2,4'-DDE                     | PBDE 156 |
|               |              | PCB 92               | PCB 163 | PCB 206                   | 4,4'-DDD                     | PBDE 181 |
|               |              | PCB 95               | PCB 165 | PCB 207                   | 2,4'-DDD                     | PBDE 183 |
|               |              | PCB 99               | PCB 166 | PCB 208                   | endosulfan I                 | PBDE 190 |
|               |              | PCB 101              | PCB 167 | PCB 209                   | endosulfan II                | PBDE 191 |
|               |              | PCB 104              | PCB 169 |                           | endosulfan sulfate           | PBDE 203 |
|               |              | PCB 105              | PCB 170 | IN:                       |                              | PBDE 205 |
|               |              | PCB 106              | PCB 172 | <i>fat</i>                | <b>Other organochlorines</b> | PBDE 206 |
|               |              | PCB 107              | PCB 174 | <i>liver</i>              | octachlorostyrene            | PBDE 209 |
|               |              | PCB 110              | PCB 175 | <i>plasma</i>             | pentachlorobenzene           |          |
|               |              | PCB 112              | PCB 176 |                           |                              |          |

**3) Gross Necropsy Protocol**

Please follow the necropsy form provided below that contains **reminder boxes** for collecting the toxicology and other samples; however, the original form can be downloaded from the following website:

<http://www.vetmed.ufl.edu/sacs/wildlife/seaturtletechniques/necropsy>

Use this form and follow it as closely as possible. The protocol is cumbersome, but results in a complete evaluation of all systems. The order of organ systems on the original form has been changed here to more closely match the order in which the necropsy is performed. Aerobic and anaerobic bacterial and fungal cultures should be performed when appropriate (not paid for but we would appreciate any results). Minimally, affected tissues should be frozen for future culture. A set of

representative tissues (thin sections) from all major organ systems listed on the necropsy datasheet should be collected and placed in 10% buffered formalin and a separate set frozen for future infectious disease cultures at -20°C or below. A set of formalinized tissues, paraffin blocks, or representative slides should be sent to Dr. Terry Norton from each case. Please send the address where the final histopathology report should be sent. The frozen set of tissues should also be sent to Dr. Norton.

Dr. Terry Norton will submit the formalinized tissues to Dr. Nancy Stedman at Athens Diagnostic Laboratory, University of Georgia College of Veterinary Medicine. Dr. Stedman will evaluate all of the sets of tissues histologically. This will allow for more standardized results. Clinicians should feel free to submit another set of tissues to your pathologist of choice.

**Supplied Materials:**

Tissue cassettes labeled for each organ for tissues in formalin

Specimen cups to store tissue cassettes in formalin (3)

Plastic tubes labeled for each organ for frozen tissue

Plastic baggie to combine all frozen samples into (1)

4 microscope slides 2 slide holders for marrow impression smears

Syringe with a 20 gauge needle and 50 mL tube for bile collection

Overnight FedEx label for shipment of bile to Tom Sheridan

\*\*\*Formalin, because it cannot be shipped, and necropsy knives/chisels are not supplied\*\*\*

Special attention/instructions:

- When collecting gastrointestinal tract samples, take care to not touch the mucosa (inner lining) with anything (gloves, forceps, etc). Mucosa needs to be intact.
- Bone marrow is needed to further define the anemia that is observed in these turtles. To collect this, chisel between a marginal and lateral scute on the carapace. Remove a piece of trabecular (spongy looking, either red or yellow) bone within the lateral scute and place it in formalin. Record the color of the trabecular bone on the datasheet. Take another piece of this bone to make four marrow impression smears on four microscope slides by gently pressing the spongy material onto the slides. Don't be too rough with the slides or the cells will lyse. Allow slides to air dry and replace them in the cardboard slide holders. Place marrow smears inside multiple sealed baggies so that formalin does not come in contact with them. Send the formalinized sample and smears to Dr. Terry Norton with the other formalinized samples. Store another piece of bone in a plastic tube frozen for future infectious disease cultures and ship these along with the frozen set to Dr. Norton.
- For necropsies occurring in South Carolina only: Bile should be collected after the liver toxicology samples have been collected. Draw as much as possible into the provided plastic syringe and transfer bile into 50 mL tube. Refrigerate sample (do NOT freeze) and deliver same day with frozen gel packs to Tom Sheridan, Folly Road Animal Hospital,. This sample will be used to identify possible indicators that can further define the anemia that is observed in these turtles.

**Storage and shipping:**

Store all formalinized tissues in formalin, keep the marrow smears away from formalin, and keep the frozen set at -20 °C or below. Send all samples to Dr. Terry Norton at the end of the season. The formalinized tissues and smears can be shipped together as long as the smears are bagged in waterproof baggies. The frozen samples should be shipped *on dry ice* overnight.

**4) Parasitology:**

**Supplied Materials:**

50 mL tubes for parasite collection (3)

2-day FedEx label to ship samples to Ellis Griener (don't use this on a Friday)

Always keep the collected parasite specimens wet immersed in water, saline or fixative. Place worms from different organs into different labeled containers initially in physiological saline (0.85% NaCl). Each label

should indicate host species, accession or necropsy number, organ from which worm was removed, and collector's name. If there are many specimens, provide many specimens. Roundworm infection may be mixed and you are trying to provide both sexes of as many species as are present. Fluke infections also may be a mixture of species. If you provide a large number of specimens, the chances you provided specimens in good condition will increase. Also, depending upon the case and the species of the host will determine how detailed you might need the identification, i.e., to superfamily, genus, species.

Trematodes and Cestodes should be placed in a dish containing either tap water or physiological saline and allowed to relax for 30-60 minutes. They should then be fixed in AFA (85ml of 85% ethanol, 10ml commercial formalin, 5ml glacial acetic acid). Specimens may be stored and sent to the parasitologist in this solution. It is best to allow large tapeworms to flatten as much as possible and not pack them too tightly, as representative sections need to be mounted flat to see structures necessary for identification. Be sure you have included scoleces with tapeworms as these structures are often lost resulting in nonidentification in most cases. Flukes need to be flattened as well and this can be accomplished by fixing specimens between glass slides with small pressure applied to the upper slide.

Nematodes should be dipped in concentrated glacial acetic acid or hot 70% ethanol to fix them in as straight a posture as possible. After they have stopped writhing, transfer them into glycerin-alcohol (90ml 70% ethanol, 10ml glycerin). They may be stored indefinitely in this solution.

#### 5) **Epibiota collection:**

##### Supplied Materials:

50 mL tubes for epibiota collection (3)

- Collect representative species and samples of epibiota from plastron, carapace, and skin.
- Place in 3 separate pre-labeled 50 mL tubes (one for each location: plastron, carapace, skin) with ethyl alcohol (preferred) or isopropyl alcohol and store at room temperature.
- Label tubes with date.
- Ship to Terry Norton at the end of the season.

#### 6) **Genetic sampling**

1. Disinfect cutting board/surface with dilute bleach solution (1:10). Place a flipper on clean cutting board/surface.
2. Press the biopsy punch firmly into the flesh as close as possible to the posterior edge of the flipper and rotate one complete turn, cutting through the flesh of flipper. Alternatively use a sterile scalpel blade to remove a small plug of tissue.
3. Push out the tissue plug by inserting a wooden skewer or wire through the hollow end of the biopsy punch and place the tissue plug into a labeled (turtle number) vial with 95% EtOH.
4. Repeat 1-3 for an additional sample.
5. Do not reuse biopsy punch, wooden skewer or scalpel blade on another animal; disinfect wire skewer with bleach solution or another appropriate disinfectant if reusing.
6. Keep samples at room temperature and ship at the end of the season to Al Segars on frozen gel packs.

Persons performing necropsy: \_\_\_\_\_

Turtle ID# \_\_\_\_\_  
(Stranding Reference)

## Sea Turtle Necropsy Report

### EXTERNAL EXAM

Ab=Abnormal NF=No Findings NE=Not Examined

Descriptions-include color, number, size, distribution, texture of lesions

**Carapace** Ab NF NE

**Trauma**

Propeller wound Puncture wounds Missing scutes Bites Tumors

Description/additional comments:

Collect scute scraping

**Carapace Epibiota** Ab NF NE

**Epibiota types**

Sponges  
Barnacle  
Polychaetes

Collect representative samples of epibiota from carapace

Goose barnacles  
Leeches  
Amphipod

Collect bone marrow from lateral scute – store in formalin, frozen, and make smears

Bryozoans  
Other \_\_\_\_\_

Description/additional comments:

**Plastron** Ab NF NE

**Trauma**

Propeller wound Puncture wounds Missing scutes Bites Tumors

**Plastron Marrow** Ab NF NE

Description/additional comments:

**Plastron Epibiota** Ab NF NE

**Epibiota types**

Sponges  
Barnacle  
Polychaetes

Collect representative samples of epibiota from plastron



Goose barnacles  
Leeches  
Amphipod

Bryozoans  
Other \_\_\_\_\_

Description/additional comments

**Integument (Skin) Ab NF NE**

Trauma

**Collect skin sample for genetics**

Sloughing  
Necrosis  
Net wounds  
Fishing line/rope  
Tumors

Propeller wounds  
Other \_\_\_\_\_

**Region: Head Neck Front Flippers Rear flippers Tail**

**Description/additional comments:**

**Integument Epibiota Ab NF NE**

Epibiota types  
Sponges  
Barnacle  
Polychaetes

**Collect representative samples of epibiota from skin**

Goose barnacles  
Leeches  
Amphipod

Bryozoans  
Other \_\_\_\_\_

Description/additional comments

**Eyes Ab NF NE**  
Location Right Left Both

**Description/additional comments:**

**Discharge** Ab NF NE Location: Ocular Nasal Oral

**For ocular: Right Left Bilateral**

**Color:** \_\_\_\_\_

**Description/additional comments:**

**Cloaca** Ab NF NE

**Swollen Prolapsed Mucosal pseudomembrane**

**Feces color:** \_\_\_\_\_

Check for sex

cloaca beyond carapace

yes

no

Glans penis

yes

no

**Description/additional comments:**

**Code 1 Only**

## MUSCULOSKELETAL SYSTEM

**Skeleton and joints** Ab NF NE

Joint/synovial fluid: Color \_\_\_\_\_

Characteristics:

Blood tinged

Cloudy/flocculent material

Plaques

Other \_\_\_\_\_

Viscosity: \_\_\_\_\_

Fractures

No

Yes,

where? \_\_\_\_\_

Dislocation

No

Yes,

where? \_\_\_\_\_

Deformities

No

Yes,  
where? \_\_\_\_\_

**Description/additional comments:**

**Musculature**    **Ab**    **NF**    **NE**

**Collect fat sample from left  
inguinal area**

Characteristics:

Abcesses  
Clotted blood  
Pale

Gelatinized  
Necrosis  
Parasites  
Cysts  
Other (Specify) \_\_\_\_\_

**Description/additional comments:**

**Coelomic cavity**    **Ab**    **NF**    **NE**

Fluid amount: \_\_\_\_\_ ml

Color: \_\_\_\_\_ Viscosity: \_\_\_\_\_

Characteristics:

Clear  
Cloudy/flocculent material  
Blood tinged  
Hemorrhage

Blood clots  
Adhesions  
Plaques  
Gritty material (hard)

**Peritoneum:**

Characteristics:

Tumors  
Abscesses /granulomas  
Congested

Hemorrhage  
Clotted blood

Parasites (trematodes in mesenteric arteries)-SAVE\_\_\_\_\_Number

**Description/additional comments:**

**CARDIOVASCULAR SYSTEM**

**Pericardial sac**    **Ab**    **NF**    **NE**

Fluid amount: \_\_\_\_\_ ml

Color:\_\_\_\_\_ Viscosity:\_\_\_\_\_

Characteristics:

Clear  
Cloudy/flocculent material  
Blood tinged  
Hemorrhage

Blood clots  
Adhesions  
Plaques  
Caseous material

Description/additional comments:

**Pulmonary arteries**    **Ab**    **NF**    **NE**    **& Aorta**

Characteristics:

Thrombi  
Plaques  
Ruptures

Parasites (Trematodes--SAVE) \_\_\_\_\_ Number, \_\_\_\_\_ Size

Description/additional comments:

**Atria**    **Ab**    **NF**    **NE**

**Collect blood samples if the heart is still beating**

Left Right Both

Characteristics:

Flaccid  
Stiff  
Thickened  
Dilated

Hemorrhage  
Pale areas  
Parasites

Dimensions (cm (l) x cm (w) x cm (h)): \_\_\_\_\_ left, \_\_\_\_\_ right  
Thickness of wall: right \_\_\_\_\_ cm, left \_\_\_\_\_ cm  
Color: Surface: \_\_\_\_\_ Lumen: \_\_\_\_\_  
Description/additional comments:

**Ventricle Ab NF NE**

Characteristics:

Dimensions: \_\_\_\_\_ cm (l) x cm (w) x cm (h)

Thickness of wall \_\_\_\_\_ cm

Weight \_\_\_\_\_ gm

Abscess/granulomas  
Masses  
Scars (fibrosis)  
Friable

Color: \_\_\_\_\_

Description/additional comments:

## GASTROINTESTINAL SYSTEM

**Liver Ab NF NE**

Characteristics:

Dimensions: \_\_\_\_\_ cm (l) x cm (w) x cm (h)

Weight: \_\_\_\_\_ gm (or lbs/oz)

Color: \_\_\_\_\_

Types of Lesions:

Abscesses/granulomas  
Cysts  
Masses

Congestion  
Fibrosis  
Necrosis

**Collect 2 liver samples  
from right lobe with  
hexane-rinsed instruments  
#1 into foil; #2 into bag**

**Collect one liver sample  
(#3) with "No Teflon"  
instruments from left lobe  
into 50 mL tube**

Severity of Lesions:

- Slight
- Mild
- Moderate
- Severe

Other:

- Fatty (greasy)
- Friable
- Cirrhotic
- Fractured

Parasites (SAVE): \_\_\_\_\_Number

**Description/additional comments:**

**Gall Bladder    Ab    NF    NE**

Bile: amount\_\_\_\_\_ml

Characteristics:    thick    thin

Color: serosa:\_\_\_\_\_mucosa:\_\_\_\_\_bile:\_\_\_\_\_

Diameter \_\_\_\_\_cm

Types of Lesions:

- Abcesses/granulomas
- Cysts
- Masses

- Congestion
- Fibrosis
- Necrosis

Other:

- Friable
- Stones
- Gritty material

Parasites (SAVE): \_\_\_\_\_Number

Description/additional comments:

**Oral Cavity & Pharynx    Ab    NF    NE**

Characteristics:

- Ulcers
- Fluid
- Vomit

|                                                                                                                                     |
|-------------------------------------------------------------------------------------------------------------------------------------|
| <p><b>South Carolina only:<br/>After liver samples are<br/>taken, collect bile with<br/>syringe and store in 50 mL<br/>tube</b></p> |
|-------------------------------------------------------------------------------------------------------------------------------------|

Congestion  
Parasites  
Barnacles

Broken beak  
Mandible  
Maxilla

Foreign bodies \_\_\_\_\_

Description/additional comments:

**Esophagus**   **Ab**   **NF**   **NE**

Characteristics:

Dilated  
Constricted  
Perforated

Fluid filled  
Foreign bodies \_\_\_\_\_(SAVE)

Parasites (SAVE) \_\_\_\_\_Number

Other \_\_\_\_\_

Mucosa:

Congested  
Hemorrhagic  
Ulcers

Necrosis  
Thickened  
Blunted papilla

Film on surface of mucosa

Color: mucosa: \_\_\_\_\_ serosa: \_\_\_\_\_

\*Common in green sea turtles

Description/additional comments:

**Stomach**   **Ab**   **NF**   **NE**

Characteristics:

Clotted blood  
Thickened  
Ruptures/laceration

Volvulus (twist)  
Erosions

Ulcers:  
Mild  
Moderate  
Severe

Focal  
Multifocal  
Focally-extensive

Extensive

Color: mucosa \_\_\_\_\_ serosa: \_\_\_\_\_ contents: \_\_\_\_\_

Contents:  
Empty  
Fluid  
Dilated with gas

Mucus  
Sand  
Rocks

Other: \_\_\_\_\_  
Foreign bodies \_\_\_\_\_ (SAVE)

Food:  
Fish  
Bivalves  
Crustaceans

Cephalopods  
Gastropods  
Other \_\_\_\_\_



Undigested  
Partially digested  
Digested

Parasites:  
Yes  
No

<50  
>50

Description/additional comments:

**Mesentery**   **Ab**   **NF**   **NE**

Characteristics:

Hemorrhage  
Clotted blood  
Masses

Parasites (trematodes in mesenteric arteries)-SAVE \_\_\_\_\_Number

Description/additional comments:

**Pancreas**   **Ab**   **NF**   **NE**

Characteristics:

Loss of lobulation   Necrotic   Edema   Inflamed

Color: \_\_\_\_\_

Description/additional comments:

**Small Intestine**   **Ab**   **NF**   **NE**

Characteristics:

Empty  
Bile  
Digesta

Other \_\_\_\_\_

Foreign bodies \_\_\_\_\_(SAVE)

Parasites (SAVE): \_\_\_\_\_Number

Color: mucosa \_\_\_\_\_serosa: \_\_\_\_\_contents: \_\_\_\_\_

Torsion/volvulus  
Perforation  
Masses  
Abcesses

Constrictions  
Diverticula  
Ulcers (#) \_\_\_\_\_

Pseudomembrane

Description/additional comments:

**Colon Ab NF NE**

Characteristics:

Torsion/volvulus  
Perforation  
Masses  
Abcesses

Constrictions  
Empty  
Feces

Fresh blood  
Tarry  
Other \_\_\_\_\_

Ulcers (#) \_\_\_\_\_

Pseudomembrane

Parasites (SAVE): \_\_\_\_\_Number

**Collect feces from colon  
and other noticeable  
parasites for parasitology**

**Color:** mucosa \_\_\_\_\_ serosa: \_\_\_\_\_ contents: \_\_\_\_\_  
**Description/additional comments:**

### LYMPHOID SYSTEM

**Spleen** Ab NF NE

**Characteristics:** Enlarged Atrophied Friable  
**Dimensions:** \_\_\_\_\_ cm (l) x cm (w) x cm (h)  
**Weight:** \_\_\_\_\_ gm

Abscess/granulomas  
Masses  
Scars (fibrosis)  
Friable

**Color:** \_\_\_\_\_

**Description/additional comments:**

**Thymus** Ab NF NE

**Characteristics:** Enlarged Atrophied Friable  
**Color:** \_\_\_\_\_  
**Description/additional comments:**

### ENDOCRINE SYSTEM

**Thyroid** Ab NF NE

**Characteristics:** Normal Enlarged Atrophied Friable  
**Dimensions:** \_\_\_\_\_ cm (l) x cm (w) x cm (h)  
**Weight:** \_\_\_\_\_ gm  
**Description/additional comments:**

**Parathyroid(s)** Ab NF NE

**If unable to find, save lining over left thymus**  
**Characteristics:** Normal Enlarged Atrophied  
**Dimension(s):** \_\_\_\_\_ cm (l) x cm (w) x cm (h)  
**Weight:** \_\_\_\_\_ gm  
**Description/additional comments:**

**Adrenal gland(s)** Ab NF NE

**Normal Enlarged Atrophied**  
**Dimensions:** \_\_\_\_\_ cm (l) x cm (w) x cm (h)  
**Weight:** \_\_\_\_\_ gm  
**Description/additional comments:**

## RESPIRATORY SYSTEM

**Trachea/Bronchi**   **Ab**   **NF**   **NE**

Abnormal Tissue:

Trachea  
Bronchi

Characteristics:

Mucosa:

White  
Vessels congested with blood

Hemorrhage  
Ulcers

Trauma:

Punctures  
Lacerations

Fluid:

Serous  
Mucoid  
Purulent

**Fluid or foam:**

**Color:** \_\_\_\_\_

**Parasites (SAVE):** \_\_\_\_\_ **Number**

**Description/additional comments:**

**Lungs**   **Ab**   **NF**   **NE**

Characteristics:

Color:

Lesion location:

Left

Right  
Both

Cranial  
Caudal  
Dorsal

Ventral  
Middle

Distribution:  
Diffuse  
Focal  
Multifocal

Severity  
Mild  
Moderate  
Severe

**Description/additional comments:**

### URINARY TRACT

**Kidneys**   **Ab**   **NF**   **NE**

Characteristics:

Dimensions R \_\_\_\_\_ cm (l) x cm (w) x cm (h)

Dimensions L \_\_\_\_\_ cm (l) x cm (w) x cm (h)

Cortex color: \_\_\_\_\_

Medulla color: \_\_\_\_\_

Lesions:

Dilated with blood  
Hemorrhage  
Clotted blood

Abcesses/granulomas  
Parasites  
Cysts

Dilated with urine  
Masses  
Calculi

Congestion  
Necrosis (focal, multifocal, diffuse)

Left weight \_\_\_\_\_ gm  
Right weight \_\_\_\_\_ gm  
Description/additional comments:

**Ureters Ab NF NE**

Characteristics:  
Dilated Strictures Granulomas Calculi (SAVE)  
Bilaterally symmetrical: Yes No  
Description/additional comments:

**Urethra Ab NF NE**

Characteristics:  
Patent: Yes No  
Lesion: Ulcers Calculi Strictures  
Description/additional comments:

**Urinary bladder Ab NF NE**

Characteristics:

Empty  
Dilated  
Thickened  
Tumors

Color: mucosa: \_\_\_\_\_ urine: \_\_\_\_\_

Mucosa:  
Hemorrhagic  
Ulcerated

Masses  
Plaques  
Necrotic

Urine: amount \_\_\_\_\_ ml Consistency: \_\_\_\_\_

Gritty material  
Clear  
Cloudy/flocculent material  
Blood tinged

Parasites:  
Yes(SAVE)

No

<5  
5-20  
>20

urinalysis strip (dip stick):

Description/additional comments:

**REPRODUCTIVE**

**Gonads Ab NF NE**

Characteristics:

Sex:

- Male
- Female

Maturity:

- Mature
- Immature

- Enlarged
- Involuted
- Masses
- Follicles

Necrotic

Description/additional comments:

**Oviduct Ab NF NE**

Characteristics:

- “ Enlarged “ Dilated with fluid “ Hemorrhagic “ Friable
- “ Tumors “ Masses “ Mucus “ Eggs

Description/additional comments:

**NERVOUS SYSTEM**

**Dura mater and Ab NF NE  
Inside calvarium**

Characteristics:

**Hemorrhage Clotted blood Abscesses/Granulomas**

Description/additional comments:

**Section brain laterally.**

**Collect ½ brain with  
hexane-rinsed instruments  
into bag.**

**Collect other ½ into  
formalin for  
histopathology.**

**Central Nervous System Ab NF NE**

Cerebral Spinal Fluid (CSF): \_\_\_\_\_ml color: \_\_\_\_\_

Spinal Cord Fluid (SCF): \_\_\_\_\_ ml color: \_\_\_\_\_

Characteristics: (denote location of change in comments)

Distended red vessels  
Abscesses/Granulomas  
Clotted blood

Hemorrhage  
Asymmetry  
Edema  
Black nodules

Lesions:

Brain  
Spinal Cord \_\_\_\_\_ (location)  
Pituitary  
Meninges

Weight: brain \_\_\_\_\_ gm pituitary \_\_\_\_\_ gm

Description/additional comments:

**Other:**

**Internal Auditory Meatus: Ab NF NE**

Other information or description continuation page:

---

---

---

---

---

---

---

---

---

---

---

---

---

---

---





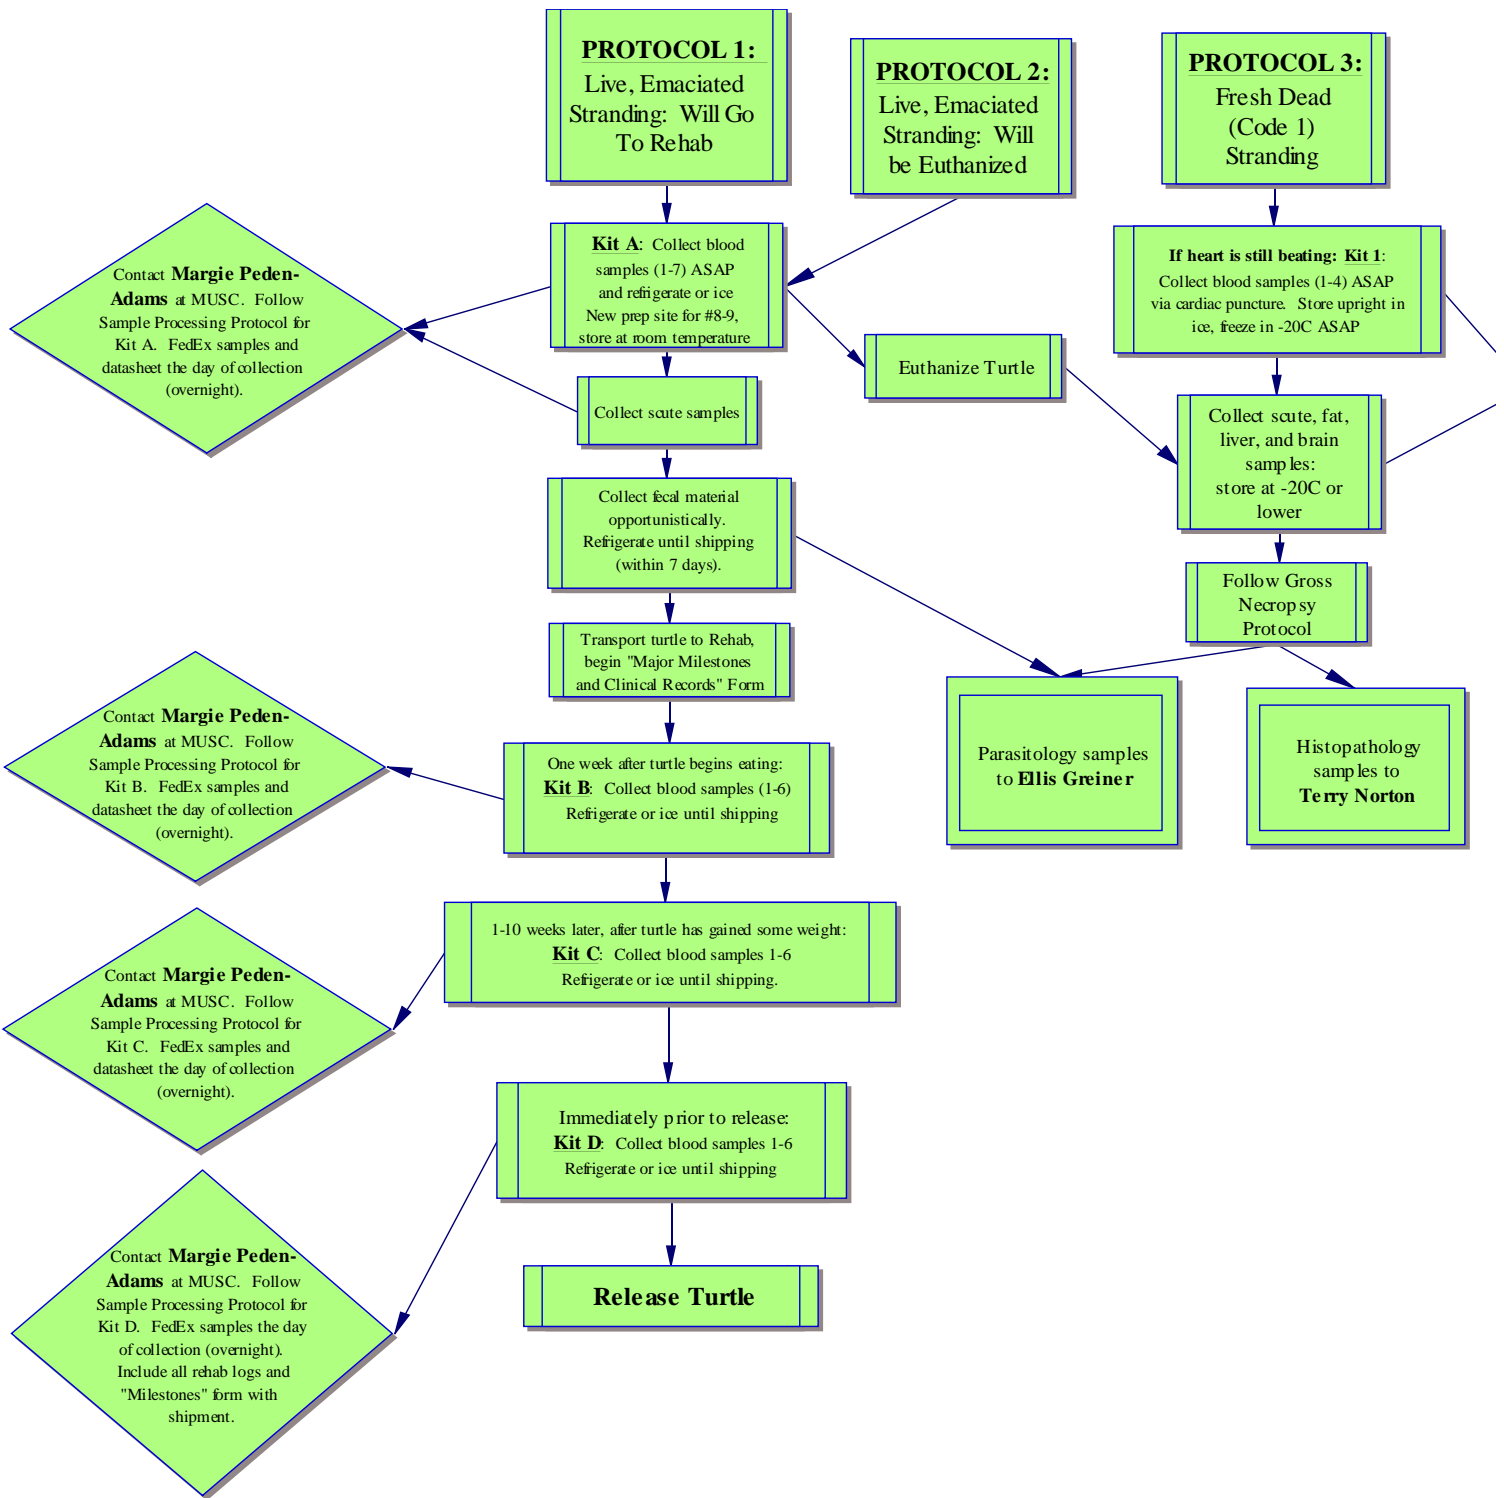

**CONTACT INFORMATION:**

**CALL** prior to or immediately after shipping. It is **critical** to notify researchers that these samples are in route. Contact information was provided for each sample recipient here:

Blood samples must be shipped out on the same day as collection.

Samples must arrive within 24-36 hours after collection.

Please contact Margie Peden-Adams to make special arrangements if samples are collected Friday-Sunday.

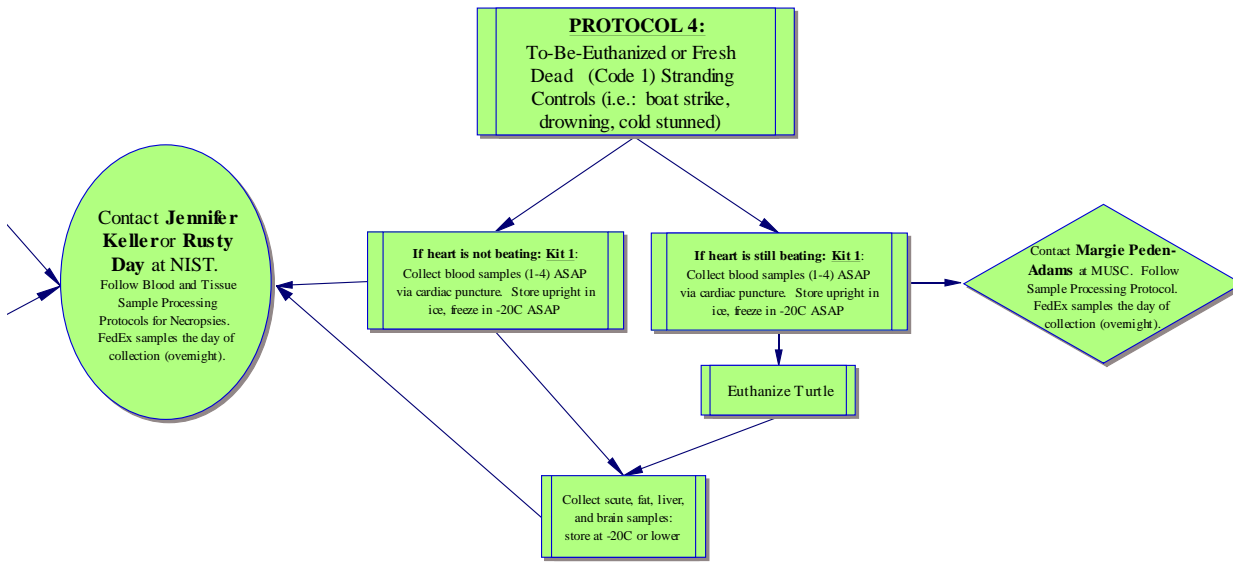

**Protocol 1: Live, Emaciated Stranding--Will Go To Rehab  
Sample Processing Protocol for Kit A**

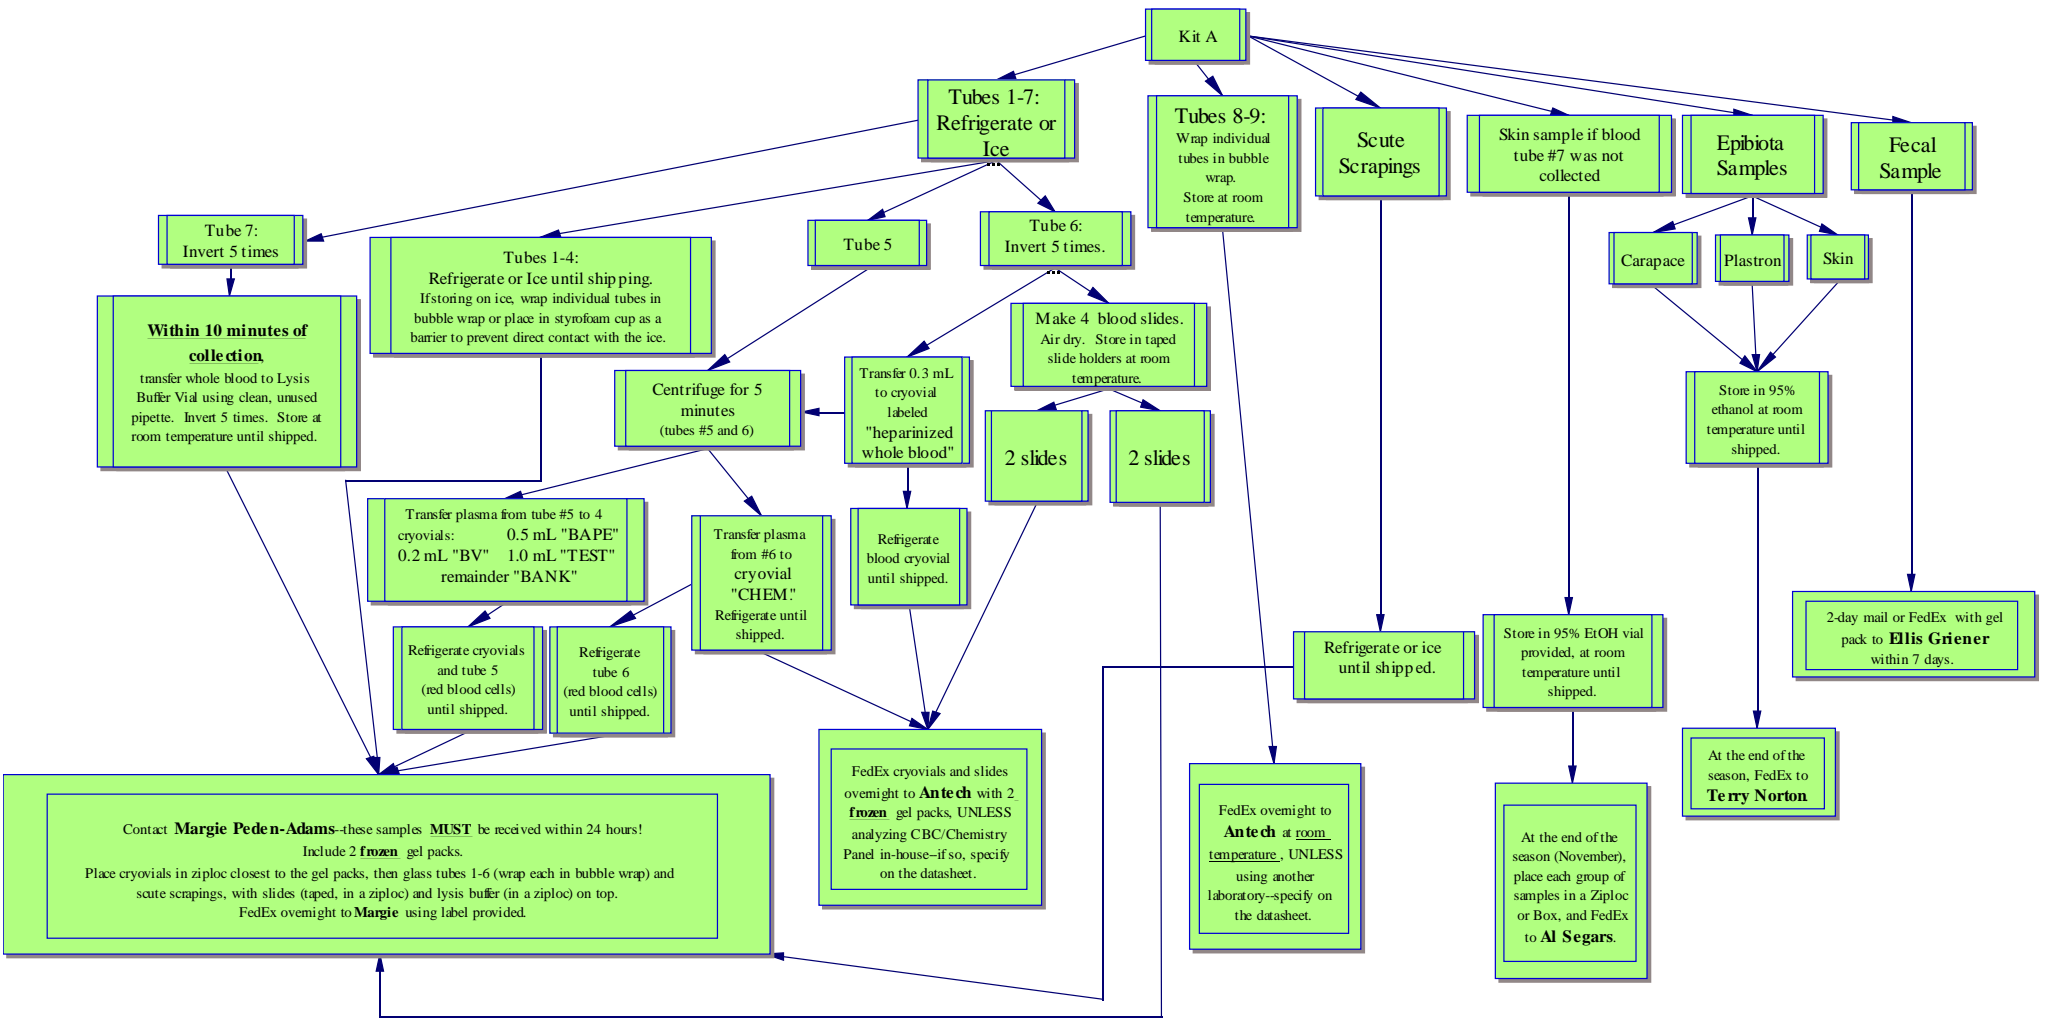

**CONTACT INFORMATION:**

**CALL** prior to or immediately after shipping. It is **critical** to notify researchers that these samples are in route. Contact information was provided for each sample recipient here:

**Protocol 1: Live, Emaciated Stranding Taken to Rehab  
Contingency Plan  
Turtle cannot withstand full sampling protocol**

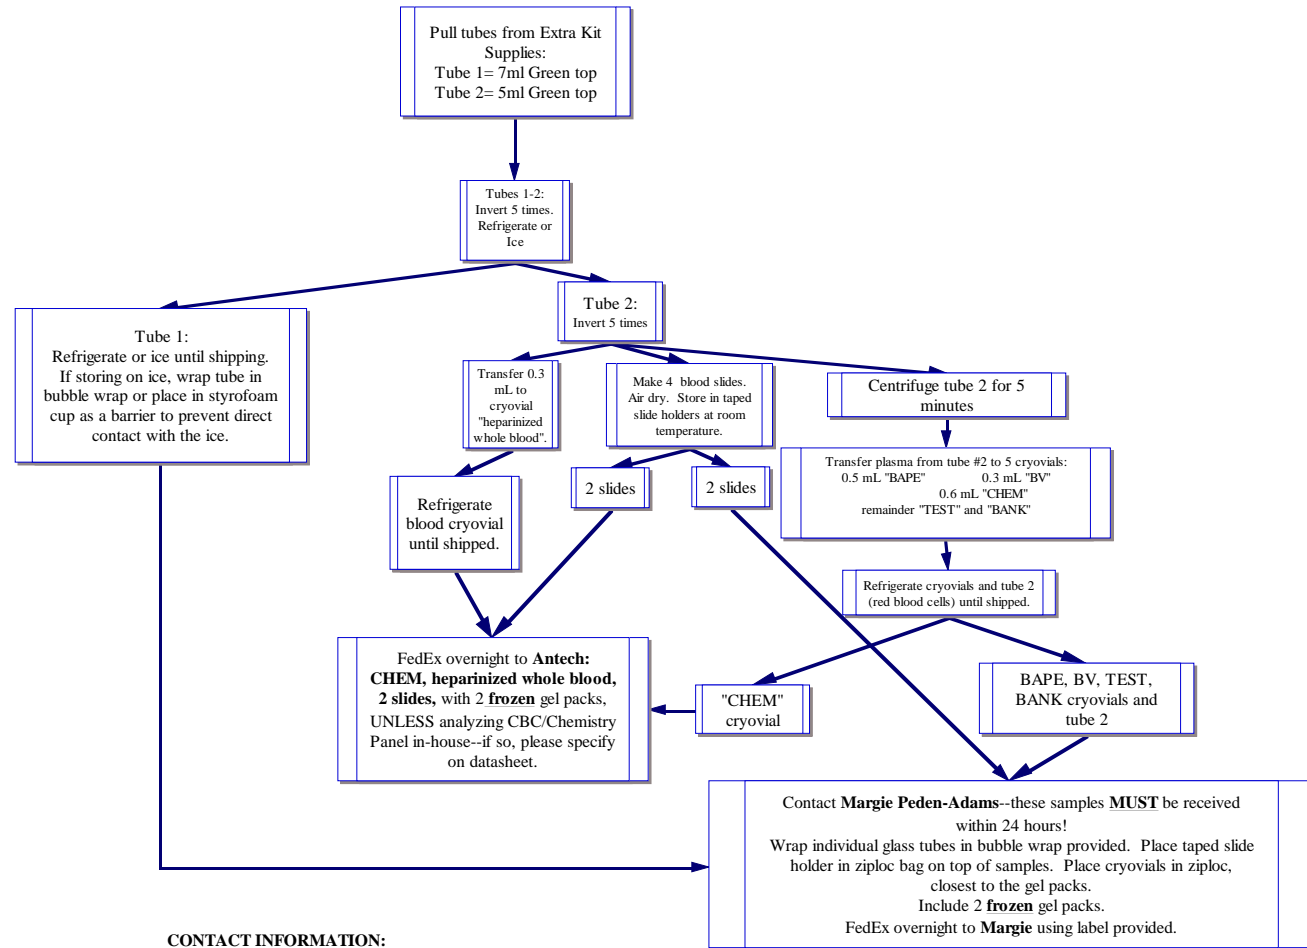

**CONTACT INFORMATION:**  
CALL prior to or immediately after shipping. It is **critical** to notify researchers that these samples are in route.  
Contact information was provided for each sample recipient here:

**Packing for Margie's Shipment**

Slides (taped closed, in ziploc)  
Tubes 1-2 (bubble-wrapped)  
Cryovials BAPE, BV, TEST, BANK (in ziploc)  
Two Gel Packs

## Protocol 1: Live, Emaciated Stranding Taken to Rehab Sample Processing for Kits B and C

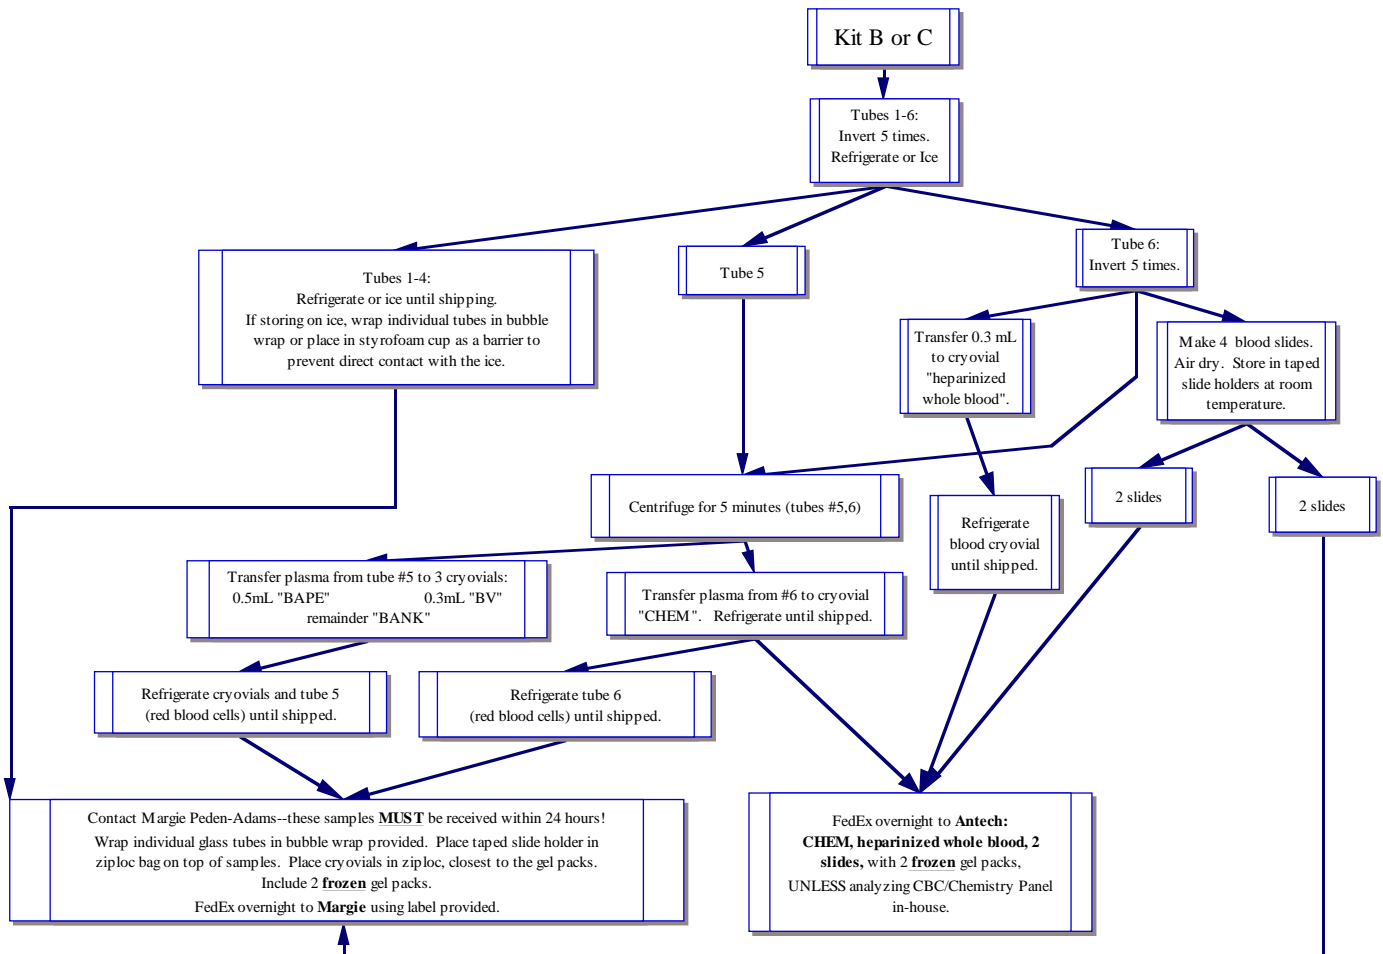

### CONTACT INFORMATION:

**CALL** prior to or immediately after shipping. It is **critical** to notify researchers that these samples are in route.

Contact information was provided for each sample recipient here:

#### Packing for Margie's Shipment

Slides (taped closed, in ziploc)  
Tubes 1-6 (bubble-wrapped)  
Cryovials BAPE, BV, BANK (in ziploc)  
Two Gel Packs

## Protocol 1: Live, Emaciated Stranding Taken to Rehab Sample Processing for Kits B and C

### Kit B or C

#### I. Tubes 1-6:

**Invert 5 times.**

**Refrigerate or Ice**

**A. Tube 6:**

**Invert 5 times.**

**1. Transfer 0.3 mL to cryovial "heparinized whole blood".**

**a. Refrigerate blood cryovial until shipped.**

**(1) FedEx overnight to Antech: CHEM, heparinized whole blood, 2 slides, with 2 frozen gel packs, UNLESS analyzing CBC/Chemistry Panel in-house.**

**2. Make 4 blood slides. Air dry. Store in taped slide holders at room temperature.**

**a. 2 slides**

**b. 2 slides**

**(1) Contact Margie Peden-Adams--these samples MUST be received within 24 hours!**

**Wrap individual glass tubes in bubble wrap provided. Place taped slide holder in ziploc bag on top of samples. Place cryovials in ziploc, closest to the gel packs.**

**Include 2 frozen gel packs.**

**FedEx overnight to Margie using label provided.**

**3. Centrifuge for 5 minutes (tubes #5,6)**

**a. Transfer plasma from tube #5 to 3 cryovials:**

**0.5mL "BAPE"**

**0.3mL "BV"**

**remainder "BANK"**

**(1) Refrigerate cryovials and tube 5 (red blood cells) until shipped.**

**b. Transfer plasma from #6 to cryovial "CHEM". Refrigerate until shipped.**

**(1) Refrigerate tube 6 (red blood cells) until shipped.**

**B. Tube 5**

**C. Tubes 1-4:**

**Refrigerate or ice until shipping.**

**If storing on ice, wrap individual tubes in bubble wrap or place in styrofoam cup as a**

**barrier to prevent direct contact with the ice.**

**Slides (taped closed, in ziploc)**

**Tubes 1-6 (bubble-wrapped)**

**Cryovials BAPE, BV, BANK (in ziploc)**

**Two Gel Packs**

**Packing for Margie's Shipment**



**Protocol 1: Live, Emaciated Stranding Taken to Rehab  
Sample Processing for Kit D**

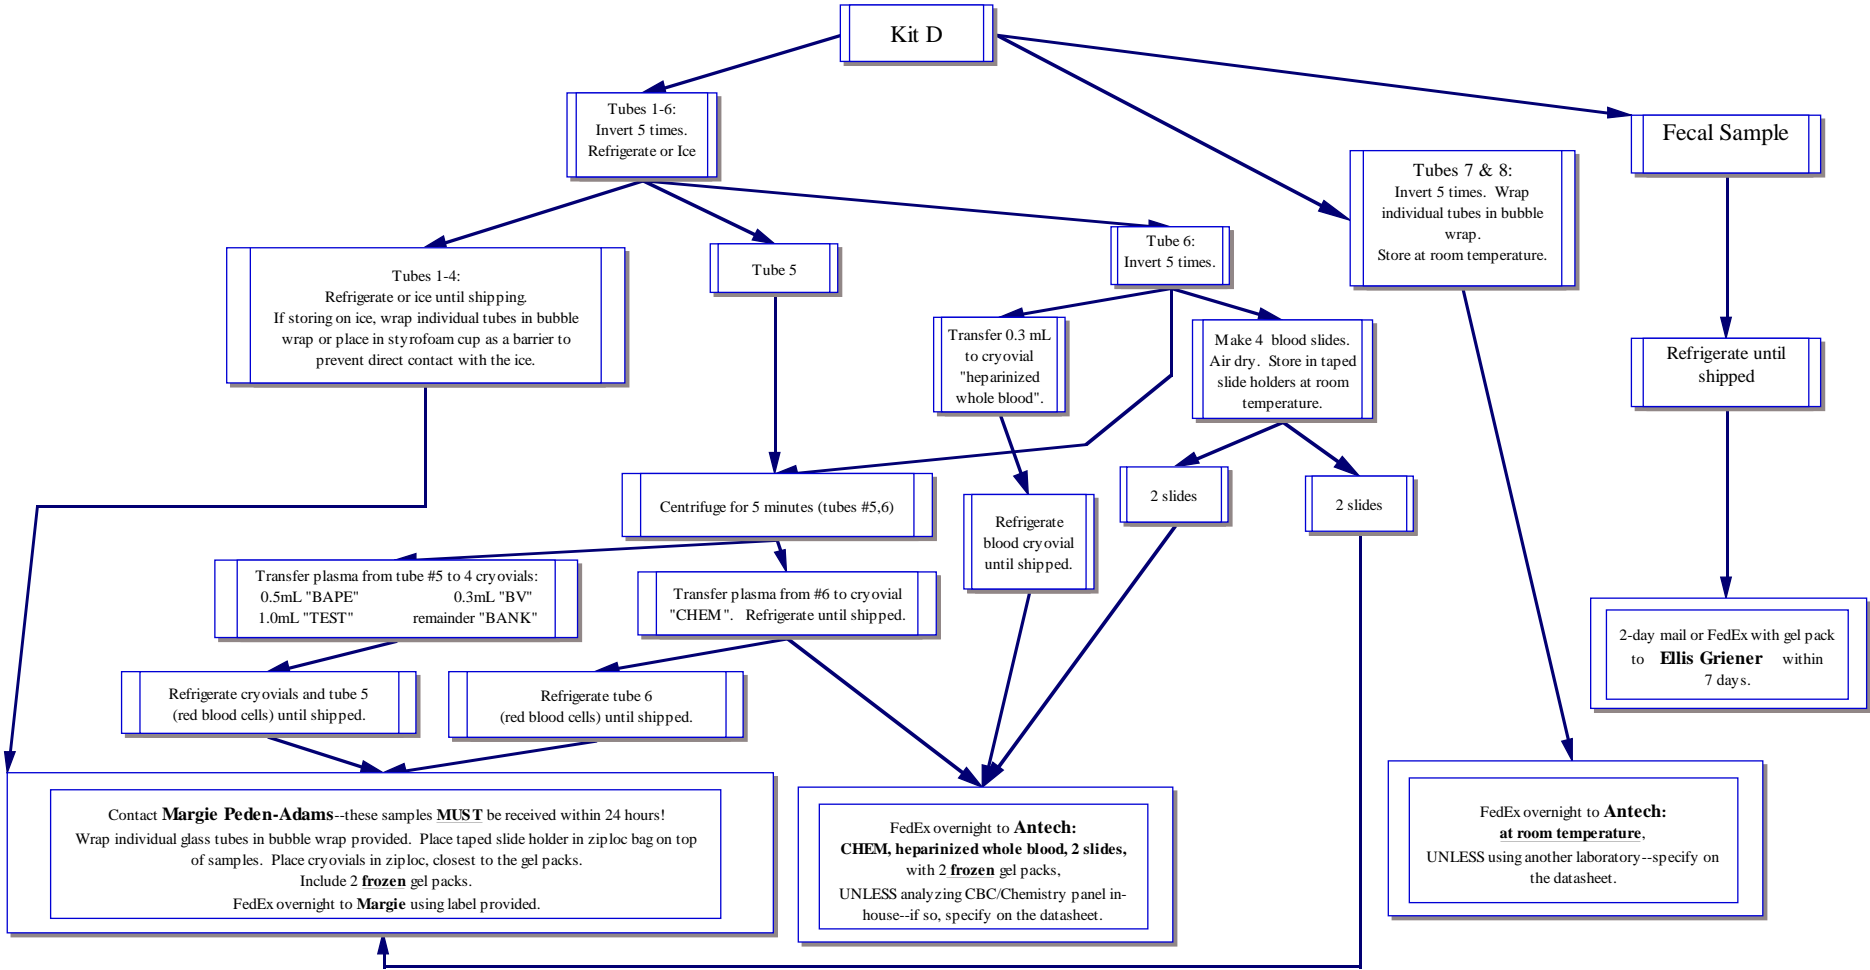

**CONTACT INFORMATION:**  
**CALL** prior to or immediately after shipping. It is **critical** to notify researchers that these samples are in route.  
 Contact information was provided for each sample recipient here:

- |                                                                                                                               |
|-------------------------------------------------------------------------------------------------------------------------------|
| <b>Packing for Margie's Shipment</b>                                                                                          |
| Slides (taped closed, in ziploc)<br>Tubes 1-6 (bubble-wrapped)<br>Cryovials BAPE, BV, TEST, BANK (in ziploc)<br>Two Gel Packs |

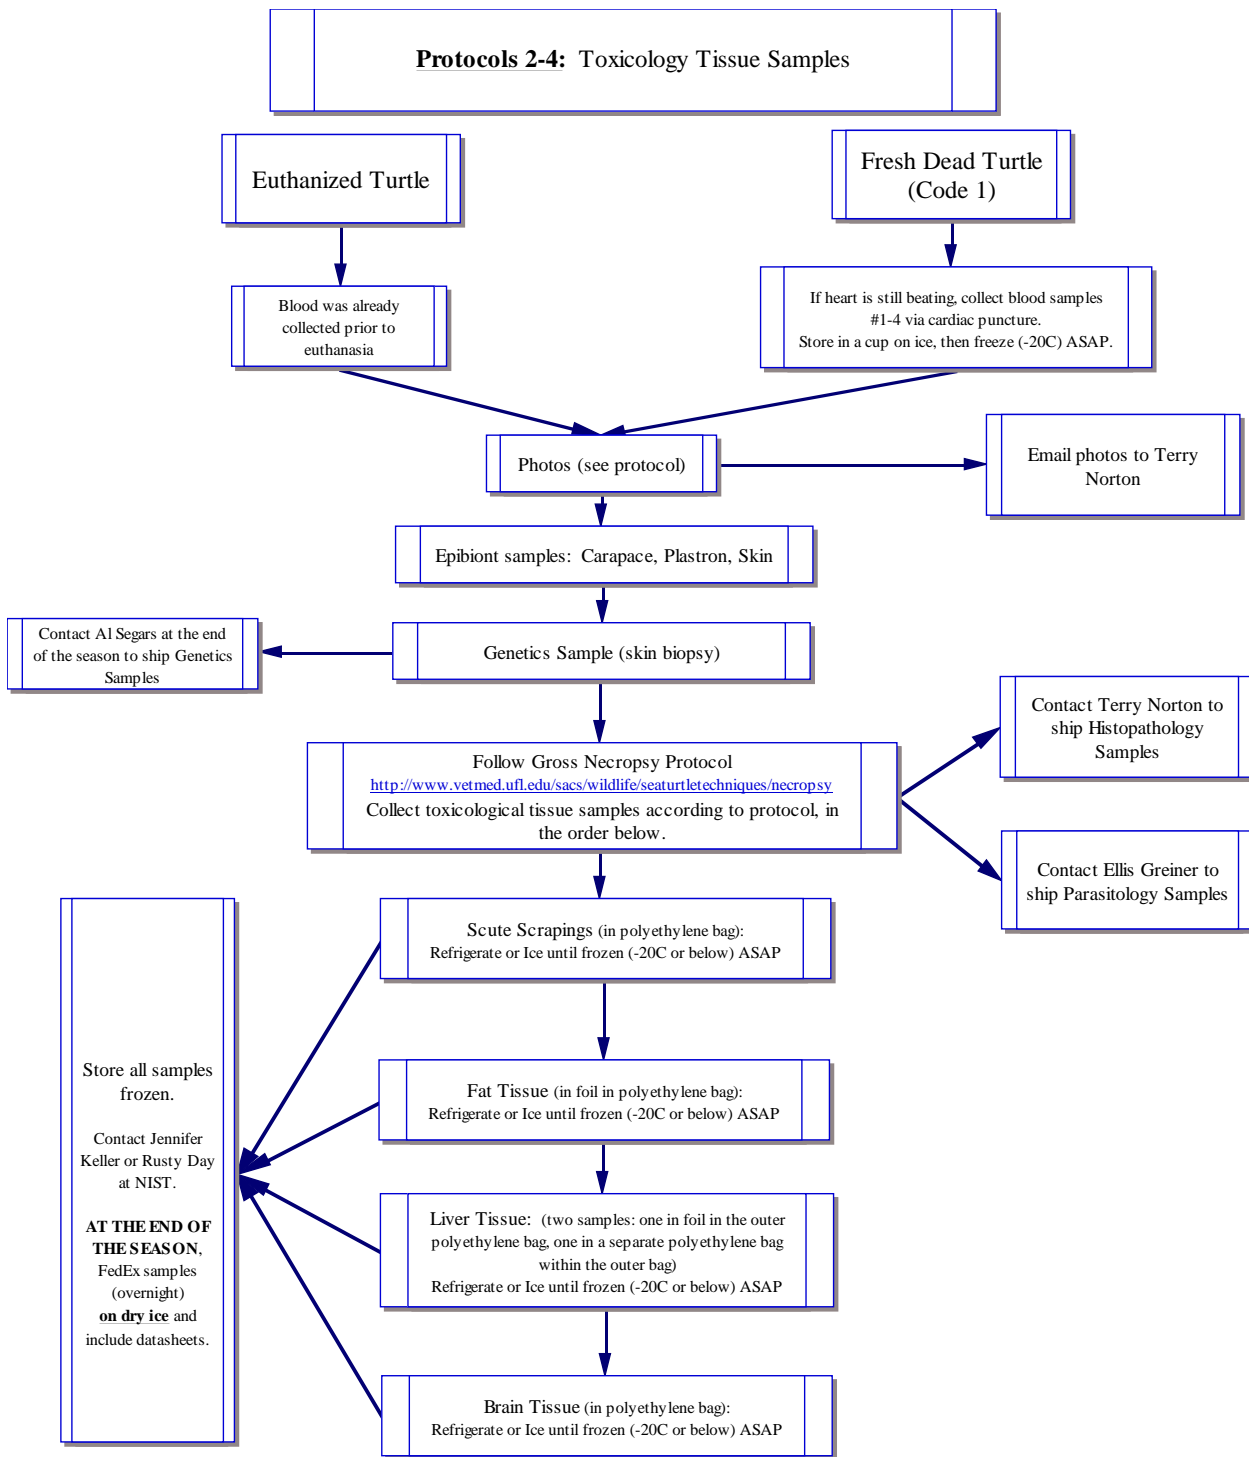

**CONTACT INFORMATION:**

**CALL** prior to or immediately after shipping. It is **critical** to notify researchers that these samples are in route. Contact information was provided for each sample recipient here.

**Protocols 2-4: Toxicology Tissue Samples**

**Euthanized Turtle**

**I. Blood was already collected prior to euthanasia**

**A. Photos (see protocol)**

**1. Epibiont samples: Carapace, Plastron, Skin**

**a. Genetics Sample (skin biopsy)**

**(1) Follow Gross Necropsy Protocol**

**<http://www.vetmed.ufl.edu/sacs/wildlife/seaturtletechniques/necropsy>**

**Collect toxicological tissue samples according to protocol, in the order below.**

**(a) Scute Scrapings (in polyethylene bag):**

**Refrigerate or Ice until frozen (-20C or below) ASAP**

**i) Fat Tissue (in foil in polyethylene bag):**

**Refrigerate or Ice until frozen (-20C or below) ASAP**

**(1) Liver Tissue: (two samples: one in foil in the outer polyethylene bag, one in a separate polyethylene bag within the outer bag)**

**Refrigerate or Ice until frozen (-20C or below) ASAP**

**(a) Brain Tissue (in polyethylene bag):**

**Refrigerate or Ice until frozen (-20C or below) ASAP**

**ii)**

**Store all samples frozen.**

**Contact Jennifer Keller or Rusty Day at NIST.**

**AT THE END OF THE SEASON,**

**FedEx samples (overnight) on dry ice and include datasheets.**

**(b) Contact Terry Norton to ship Histopathology Samples**

**(c) Contact Ellis Greiner to ship Parasitology Samples**

**(2) Contact Al Segars at the end of the season to ship Genetics Samples**

**2. Email photos to Terry Norton**

**Fresh Dead Turtle (Code 1)**

**I. If heart is still beating, collect blood samples #1-4 via cardiac puncture.**

**Store in a cup on ice, then freeze (-20C) ASAP.**

## Debilitated Loggerhead Study Datasheet for PROTOCOL 1: Turtles sent to rehabilitation Major Milestones and Clinical Records

Turtle Stranding ID (given by State): \_\_\_\_\_ State: \_\_\_\_\_

Rehabilitation Center Name: \_\_\_\_\_

Rehabilitation Center's Name for the turtle: \_\_\_\_\_

| Milestone                   | Date/location | Time | by Whom |
|-----------------------------|---------------|------|---------|
| Turtle discovered           |               |      |         |
| Turtle arrived at rehab     |               |      |         |
| Turtle began eating         |               |      |         |
| Turtle condition changed    |               |      |         |
| How?                        |               |      |         |
| Turtle recovered completely |               |      |         |
| Turtle released             |               |      |         |

**Record of measurements**

**Record of samples**

| Date | SCL*<br>cm or in | Weight<br>kg or lbs | Depth<br>cm or in | Plastron concavity<br>measurement** cm or in | Date | Kit number |
|------|------------------|---------------------|-------------------|----------------------------------------------|------|------------|
|      |                  |                     |                   |                                              |      |            |
|      |                  |                     |                   |                                              |      |            |
|      |                  |                     |                   |                                              |      |            |
|      |                  |                     |                   |                                              |      |            |
|      |                  |                     |                   |                                              |      |            |
|      |                  |                     |                   |                                              |      |            |
|      |                  |                     |                   |                                              |      |            |
|      |                  |                     |                   |                                              |      |            |
|      |                  |                     |                   |                                              |      |            |
|      |                  |                     |                   |                                              |      |            |
|      |                  |                     |                   |                                              |      |            |
|      |                  |                     |                   |                                              |      |            |
|      |                  |                     |                   |                                              |      |            |
|      |                  |                     |                   |                                              |      |            |
|      |                  |                     |                   |                                              |      |            |

SCL = straight carapace length from nuchal notch to posterior marginal notch

\*See diagram in protocol for how to take this measurement

**Record of notable changes in condition or behavior**

| Date | Health measures<br>(attach additional lab data) |    |         | Description of change in condition or behavior |
|------|-------------------------------------------------|----|---------|------------------------------------------------|
|      | PCV                                             | TS | glucose |                                                |
|      |                                                 |    |         |                                                |
|      |                                                 |    |         |                                                |
|      |                                                 |    |         |                                                |
|      |                                                 |    |         |                                                |
|      |                                                 |    |         |                                                |
|      |                                                 |    |         |                                                |
|      |                                                 |    |         |                                                |
|      |                                                 |    |         |                                                |
|      |                                                 |    |         |                                                |
|      |                                                 |    |         |                                                |
|      |                                                 |    |         |                                                |
|      |                                                 |    |         |                                                |
|      |                                                 |    |         |                                                |
|      |                                                 |    |         |                                                |
|      |                                                 |    |         |                                                |

PCV = packed cell volume or hematocrit

TS= total solids via refractometer



**Debilitated Loggerhead Study**  
**Datasheet for PROTOCOL 1: Turtles sent to rehabilitation**  
**Initial Sampling--Kit A**

Turtle Stranding ID (given by State): \_\_\_\_\_ State: \_\_\_\_\_  
 Sampling kit number: \_\_\_\_\_  
 Rehabilitation Center Name: \_\_\_\_\_  
 Rehabilitation Center's Name for the turtle: \_\_\_\_\_

| Timing of Major Events                | Date/ location | Time | by whom |
|---------------------------------------|----------------|------|---------|
| Turtle discovered                     |                |      |         |
| Blood samples taken                   |                |      |         |
| Blood samples refrigerated            |                |      |         |
| Blood samples shipped out             |                |      |         |
| Blood samples arrived in Charleston   |                |      |         |
| Blood samples processed in Charleston |                |      |         |
| Blood samples banked in Charleston    |                |      |         |
| Scute scrapings taken                 |                |      |         |
| Scute scrapings frozen in Charleston  |                |      |         |
| Turtle arrived at rehab center        |                |      |         |

**Initial measurements**

Photos taken (page 4 of protocol)?                    yes                    no  
 Body condition (circle one)                    good                    fair                    poor  
 Straight carapace length from nuchal notch to most posterior notch \_\_\_\_\_ cm or in  
 Straight carapace length from nuchal notch to most posterior tip \_\_\_\_\_ cm or in  
 Straight carapace width \_\_\_\_\_ cm or in  
 Body depth \_\_\_\_\_ cm or in  
 Plastron concavity measurement (see protocol for method) \_\_\_\_\_ cm or in  
 Weight \_\_\_\_\_ kg or lbs  
 Date measurements taken \_\_\_\_\_

**Notes/ Checklist on Blood sampling**

Were tubes collected in the proper order (shown below)?                    yes                    no  
 If no, how were they collected?

Were all tubes filled to capacity? Provide estimated volumes and tube lot numbers here:

| Tube                   | Estimated mL | Lot # | Purpose                                                     |
|------------------------|--------------|-------|-------------------------------------------------------------|
| 7mL Green-top tube #1: |              |       | immune function                                             |
| 5mL Green-top tube #2: |              |       | metals analysis                                             |
| 5mL Green-top tube #3: |              |       | OC analysis                                                 |
| 5mL Green-top tube #4: |              |       | OC analysis                                                 |
| 5mL Green-top tube #5: |              |       | bile acids, biliverdin, electrophoresis, testosterone, bank |
| 5mL Green-top tube #6: |              |       | CBC, Blood chemistry                                        |
| 3mL Red-top tube #7:   |              |       | genetics- need 0.5- 1 ml                                    |
|                        |              |       | <i>(postpone tube 7 if severely compromised)</i>            |
| Culture tube # 8*      |              |       | <b>* new prep/ needle</b>                                   |

*Send datasheet with blood, cryovials, "Al Segars" slides and scute samples to Margie Peden-Adams.*

## Debilitated Loggerhead Study Datasheet for PROTOCOL 1: Turtles sent to rehabilitation Initial Sampling--Kit A

SAMPLING KIT NUMBER:

Blood slides (4) made? yes no

Was more than one needle used to collect tubes(1-4)? yes no

If so, which tube received the new needle?  
 New needle/ skin prep for tube 8? yes no

Was the turtle transported before blood was taken? yes no

If so, how and duration of trip?

**Notes on Scute Scrapings or General Comments:**

---

**Additional sampling:**

|                                           | Date collected | Date shipped | Rx/dose/date      |
|-------------------------------------------|----------------|--------------|-------------------|
| Fecal Sample                              |                |              |                   |
|                                           | Date collected | Date shipped |                   |
| Epibiota Samples                          |                |              |                   |
|                                           | Date           | Biopsy site  | Lab sent to       |
| Biopsy taken (lesion or mass)             |                |              |                   |
| Biopsy taken for genetics (if no tube #7) |                |              | send to Al Segars |

**Blood Processing Checklist:**

---

3mL Red-top tube #7:  
 sample transferred to lysis buffer

5mL Green-top tube #5:

| Cryovial(s) | Volume |
|-------------|--------|
| BAPE        |        |
| BV          |        |
| TEST        |        |
| BANK        |        |

More than 1 BANK cryovial used? Yes No

If Yes, how many, and volumes in each: \_\_\_\_\_

5mL Green-top tube #6:

If you used your own in-house lab, explain your processing methods and instrumentation used:

| Cryovial(s)       | Volume |
|-------------------|--------|
| CHEM              |        |
| Heparinized blood |        |

Did you retain and ship red blood cells from tubes #5 and 6? yes no

*Send datasheet with blood, cryovials, "Al Segars" slides and scute samples to Margie Peden-Adams.*



# Datasheet for PROTOCOL 1: Turtles sent to rehabilitation

## Second Sampling--Kit B

(1 week after turtle begins eating)

Turtle Stranding ID (given by State): \_\_\_\_\_ State: \_\_\_\_\_

Sampling kit number: \_\_\_\_\_

Rehabilitation Center Name: \_\_\_\_\_

Rehabilitation Center's Name for the turtle: \_\_\_\_\_

| Timing of Major Events                | Date | Time | by whom |
|---------------------------------------|------|------|---------|
| Turtle began feeding                  |      |      |         |
| Blood samples taken                   |      |      |         |
| Blood samples refrigerated            |      |      |         |
| Blood samples shipped out             |      |      |         |
| Blood samples arrived in Charleston   |      |      |         |
| Blood samples processed in Charleston |      |      |         |
| Blood samples banked in Charleston    |      |      |         |

Body condition (circle one)            good            fair            poor

**Measurements**

Straight carapace length from nuchal notch to most posterior notch \_\_\_\_\_ cm or in

Body depth \_\_\_\_\_ cm or in

Plastron concavity measurement (see protocol for method) \_\_\_\_\_ cm or in

Weight \_\_\_\_\_ kg or lbs

Date measurements taken \_\_\_\_\_

**Notes/Checklist on Blood sampling**

Were tubes collected in the proper order (shown below)?            yes            no

If no, how were they collected?

Were all tubes filled to capacity? Provide estimated volumes and tube lot numbers here:

| Tube                   | Estimated mL | Lot # | Purpose                                       |
|------------------------|--------------|-------|-----------------------------------------------|
| 7mL Green-top tube #1: |              |       | immune function                               |
| 5mL Green-top tube #2: |              |       | metals                                        |
| 5mL Green-top tube #3: |              |       | OC analysis                                   |
| 5mL Green-top tube #4: |              |       | OC analysis                                   |
| 5mL Green-top tube #5: |              |       | bile acids, biliverdin, electrophoresis, bank |
| 5mL Green-top tube #6: |              |       | CBC, Blood chem                               |

Blood slides (4) made?            yes            no

Was more than one needle used to collect these tubes?            yes            no

If so, which tube received the new needle?

**Debilitated Loggerhead Study**  
**Datasheet for PROTOCOL 1: Turtles sent to rehabilitation**  
**Second Sampling--Kit B**  
(1 week after turtle begins eating)

**Notes on Turtle's condition**

---

Provide observations of changes in feeding, swimming, and diving behaviors, weight gain, changes in skin coloration, and attach recent blood chemistry values with dates (if available)

# Datasheet for PROTOCOL 1: Turtles sent to rehabilitation Third Sampling--Kit C

(within 10 weeks of second sample and after slight improvement, but not fully recovered)

Turtle Stranding ID (given by State): \_\_\_\_\_ State: \_\_\_\_\_

Sampling kit number: \_\_\_\_\_

Rehabilitation Center Name: \_\_\_\_\_

Rehabilitation Center's Name for the turtle: \_\_\_\_\_

| Timing of Major Events                | Date | Time | by whom |
|---------------------------------------|------|------|---------|
| Turtle showed observable improvement  |      |      |         |
| Describe improvement:                 |      |      |         |
| Blood samples taken                   |      |      |         |
| Blood samples refrigerated            |      |      |         |
| Blood samples shipped out             |      |      |         |
| Blood samples arrived in Charleston   |      |      |         |
| Blood samples processed in Charleston |      |      |         |
| Blood samples banked in Charleston    |      |      |         |

Body condition (circle one)      good      fair      poor

**Measurements**

Straight carapace length from nuchal notch to most posterior notch \_\_\_\_\_ cm or in

Body depth \_\_\_\_\_ cm or in

Plastron concavity measurement (see protocol for method) \_\_\_\_\_ cm or in

Weight \_\_\_\_\_ kg or lbs

Date measurements taken \_\_\_\_\_

**Notes/Checklist on Blood sampling**

Were tubes collected in the proper order (shown below)?      yes      no

If no, how were they collected?

Were all tubes filled to capacity? Provide estimated volumes and tube lot numbers here:

| Tube                   | Estimated mL | Lot # | Purpose                                       |
|------------------------|--------------|-------|-----------------------------------------------|
| 7mL Green-top tube #1: |              |       | immune function                               |
| 5mL Green-top tube #2: |              |       | metals                                        |
| 5mL Green-top tube #3: |              |       | OC analysis                                   |
| 5mL Green-top tube #4: |              |       | OC analysis                                   |
| 5mL Green-top tube #5: |              |       | bile acids, biliverdin, electrophoresis, bank |
| 5mL Green-top tube #6: |              |       | CBC, Blood chem                               |

Blood slides (4) made?      yes      no

Was more than one needle used to collect these tubes?      yes      no

If so, which tube received the new needle?

**Datasheet for PROTOCOL 1: Turtles sent to rehabilitation**  
**Third Sampling--Kit C**

(within 10 weeks of second sample and after slight improvement, but not fully recovered)

**Notes on Turtle's condition**

---

Provide observations of changes in feeding, swimming, and diving behaviors, weight gain, changes in skin coloration, and attach recent blood chemistry values with dates (if available)

# Datasheet for PROTOCOL 1: Turtles sent to rehabilitation

## Final Recovered Sampling--Kit D

(fully recovered, just prior to release)

Turtle Stranding ID (given by State): \_\_\_\_\_ State: \_\_\_\_\_

Sampling kit number: \_\_\_\_\_

Rehabilitation Center Name: \_\_\_\_\_

Rehabilitation Center's Name for the turtle: \_\_\_\_\_

**Tags Prior to Release (fill in only if tags are known - provide tag numbers later if need be)**

| Tag # | Tag Type (i.e. PIT or flipper tag) | Tag Location (i.e. front right flipper) |
|-------|------------------------------------|-----------------------------------------|
|       |                                    |                                         |
|       |                                    |                                         |
|       |                                    |                                         |
|       |                                    |                                         |
|       |                                    |                                         |

| Timing of Major Events                | Date | Time | by whom |
|---------------------------------------|------|------|---------|
| Turtle showed complete recovery       |      |      |         |
| Blood samples taken                   |      |      |         |
| Blood samples refrigerated            |      |      |         |
| Blood samples shipped out             |      |      |         |
| Blood samples arrived in Charleston   |      |      |         |
| Blood samples processed in Charleston |      |      |         |
| Blood samples banked in Charleston    |      |      |         |

Body condition (circle one)            good            fair            poor

| Fecal Sample | date collected | date shipped | Rx/dose/date |
|--------------|----------------|--------------|--------------|
|              |                |              |              |

**Final Measurements**

Straight line (using calipers): **cm or in**

Carapace length:    Notch-Notch \_\_\_\_\_            Notch-Tip \_\_\_\_\_

Carapace width (widest point) \_\_\_\_\_

Body depth (maximum) \_\_\_\_\_

Head width \_\_\_\_\_

Plastron concavity (see protocol for method) \_\_\_\_\_

Plastron length (midline, including small scale) \_\_\_\_\_

Curved: **cm or in**

Carapace length:    Notch-Notch \_\_\_\_\_            Notch-Tip \_\_\_\_\_

Carapace width (widest point) \_\_\_\_\_

Plastron width (widest point) \_\_\_\_\_

Tail length:                      To Vent \_\_\_\_\_                      To Tip \_\_\_\_\_

Weight: \_\_\_\_\_ **kg or lbs**

Date measurements taken: \_\_\_\_\_

## Datasheet for PROTOCOL 1: Turtles sent to rehabilitation

# Final Recovered Sampling--Kit D

(fully recovered, just prior to release)

### Notes/Checklist on Blood sampling

---

Were tubes collected in the proper order (shown below)?      yes                      no  
 If no, how were they collected?

Were all tubes filled to capacity? Provide estimated volumes and tube lot numbers here:

| Tube                   | Estimated mL | Lot # | Purpose                                                     |
|------------------------|--------------|-------|-------------------------------------------------------------|
| 7mL Green-top tube #1: |              |       | immune function                                             |
| 5mL Green-top tube #2: |              |       | metals analysis                                             |
| 5mL Green-top tube #3: |              |       | OC analysis                                                 |
| 5mL Green-top tube #4: |              |       | OC analysis                                                 |
| 5mL Green-top tube #5: |              |       | bile acids, biliverdin, electrophoresis, testosterone, bank |
| 5mL Green-top tube #6: |              |       | CBC, Blood chemistry                                        |
| Culture tube # 8*      |              |       | * new prep/ needle                                          |

Blood slides (4) made?                                              yes                      no

Was more than one needle used to collect tubes(1-4)?      yes                      no  
 If so, which tube received the new needle?

New needle/ skin prep for tube 8?                                      yes                      no

Was the turtle transported before blood was taken?              yes                      no  
 If so, how and duration of trip?

### Notes on Turtle's condition

---

Provide observations of changes in feeding, swimming, and diving behaviors, weight gain, changes in skin coloration, and attach recent blood chemistry values with dates (if available)

## Datasheet for PROTOCOL 2: Turtles to be euthanized Blood Sampling

Turtle Stranding ID (given by State): \_\_\_\_\_ State: \_\_\_\_\_

Sampling kit number: \_\_\_\_\_

| Timing of Major Events                | Date | Time | by whom |
|---------------------------------------|------|------|---------|
| Turtle discovered                     |      |      |         |
| Blood samples taken                   |      |      |         |
| Blood samples refrigerated            |      |      |         |
| Blood samples shipped out             |      |      |         |
| Blood samples arrived in Charleston   |      |      |         |
| Blood samples processed in Charleston |      |      |         |
| Blood samples banked in Charleston    |      |      |         |

|                            |                |              |
|----------------------------|----------------|--------------|
| Fecal Sample, if available | Date collected | Date shipped |
|                            |                |              |

**Turtle Measurements**

Straight carapace length from nuchal notch to most posterior notch \_\_\_\_\_ cm or in

Body depth \_\_\_\_\_ cm or in

Plastron concavity measurement (see protocol for method) \_\_\_\_\_ cm or in

Weight \_\_\_\_\_ kg or lbs

Date measurements taken \_\_\_\_\_

**Notes/Checklist on Blood sampling**

Were tubes collected in the proper order (shown below)?            yes            no

If no, how were they collected?

Were all tubes filled to capacity? Provide estimated volumes and tube lot numbers here:

| Tube                   | Estimated mL | Lot # | Purpose         |
|------------------------|--------------|-------|-----------------|
| 5mL Green-top tube #1: |              |       | OC analysis     |
| 5mL Green-top tube #2: |              |       | OC analysis     |
| 5mL Green-top tube #3: |              |       | metals analysis |
| 5mL Green-top tube #4: |              |       | metals analysis |

Was more than one needle used to collect tubes 1-4?            yes            no

If so, which tube received the new needle?

Was the turtle transported before blood was taken?            yes            no

**Euthanasia**

| Date | Type/ volume of euthanasia solution | Euthanized by: |
|------|-------------------------------------|----------------|
|      |                                     |                |

## Datasheet for PROTOCOL 3: Necropsies Euthanized turtle

Turtle Stranding ID (given by State): \_\_\_\_\_ State: \_\_\_\_\_

| Timing of Major Events              | Date | Time | by whom |
|-------------------------------------|------|------|---------|
| Turtle discovered                   |      |      |         |
| Turtle euthanized                   |      |      |         |
| Turtle iced/frozen at _____ °C      |      |      |         |
| Necropsy begins                     |      |      |         |
| Scute scraping taken                |      |      |         |
| Fat sample taken                    |      |      |         |
| 3 Liver samples taken               |      |      |         |
| Brain sample taken                  |      |      |         |
| Samples iced or refrigerated        |      |      |         |
| Samples frozen at _____ °C          |      |      |         |
| Samples shipped                     |      |      |         |
| Tissue samples banked in Charleston |      |      |         |
| Internal parasite samples taken     |      |      |         |
| Epibiota samples taken              |      |      |         |
| Genetics sample taken               |      |      |         |

**Storage locations of samples prior to shipping to NIST**

|         | Institution | Freezer name | °C | Container description | Contact person | Email or Phone |
|---------|-------------|--------------|----|-----------------------|----------------|----------------|
| Scute   |             |              |    |                       |                |                |
| Fat     |             |              |    |                       |                |                |
| 3 Liver |             |              |    |                       |                |                |
| Brain   |             |              |    |                       |                |                |

*Fill out below only if blood was not taken before the turtle was euthanized.*

**Turtle Measurements**

Straight carapace length from nuchal notch to most posterior notch \_\_\_\_\_ cm or in

Body depth \_\_\_\_\_ cm or in

Plastron concavity measurement (see protocol for method) \_\_\_\_\_ cm or in

Weight \_\_\_\_\_ kg or lbs

Date measurements taken \_\_\_\_\_

**Euthanasia**

|      |                                     |                |
|------|-------------------------------------|----------------|
| Date | Type/ volume of euthanasia solution | Euthanized by: |
|      |                                     |                |



## Datasheet for PROTOCOL 3: Necropsies Dead Stranding

Turtle Stranding ID (given by State): \_\_\_\_\_ State: \_\_\_\_\_

Sampling kit number: \_\_\_\_\_

| Timing of Major Events              | Date | Time | by whom |
|-------------------------------------|------|------|---------|
| Turtle discovered live or dead      |      |      |         |
| Turtle died natural or euthanized   |      |      |         |
| Turtle iced/frozen at _____ °C      |      |      |         |
| Necropsy begins                     |      |      |         |
| Scute scraping taken                |      |      |         |
| Fat sample taken                    |      |      |         |
| 3 Liver samples taken               |      |      |         |
| Blood samples taken neck or heart   |      |      |         |
| Fecal samples taken                 |      |      |         |
| Brain sample taken                  |      |      |         |
| Samples iced or refrigerated        |      |      |         |
| Samples frozen at _____ °C          |      |      |         |
| Samples shipped                     |      |      |         |
| Tissue samples banked in Charleston |      |      |         |
| Internal parasite samples taken     |      |      |         |
| Epibiota samples taken              |      |      |         |
| Genetics sample taken blood or skin |      |      |         |

### Turtle Measurements

Photos taken (page 4 of protocol)?                      yes                      no  
 Body condition (circle one)                      good                      fair                      poor  
 Straight carapace length from nuchal notch to most posterior notch \_\_\_\_\_ cm or in  
 Straight carapace length from nuchal notch to most posterior tip \_\_\_\_\_ cm or in  
 Straight carapace width \_\_\_\_\_ cm or in  
 Body depth \_\_\_\_\_ cm or in  
 Plastron concavity measurement (see protocol for method) \_\_\_\_\_ cm or in  
 Weight \_\_\_\_\_ kg or lbs  
 Date measurements taken \_\_\_\_\_

### Notes on Blood sampling

Was the heart still beating?                                              yes                      no  
 Were tubes collected in the proper order (shown below)?                      yes                      no  
 If no, how were they collected?

Were all tubes filled to capacity?                      Estimated volumes:                      Lot #:

5mL Green-top tube #1: \_\_\_\_\_  
 5mL Green-top tube #2: \_\_\_\_\_  
 5mL Green-top tube #3: \_\_\_\_\_  
 5mL Green-top tube #4: \_\_\_\_\_

## Datasheet for PROTOCOL 3: Necropsies Dead Stranding

Turtle Stranding ID (given by State): \_\_\_\_\_ State: \_\_\_\_\_

Sampling kit number: \_\_\_\_\_

Provide a full description of how the blood samples were taken:

**Notes on Tissue sampling**

---

Were proper provided instruments used on all samples?  
If no, please describe.

Did any tissues touch another surface other than provided instruments and storage materials?  
If yes, please describe.

Scute samples:

Fat Sample Description:

color (i.e. yellow, green, brown, black)  
texture (i.e. buttery, watery, flaccid)  
sampling location if other than the left inguinal region

Liver Sample: Was gallbladder broken before sampling?                    yes                    no  
If yes, did bile come in contact with these particular samples?            yes    don't know    no

Brain Sample: Was brain sampled in whole or only a portion?

**Storage locations of samples prior to shipping to NIST**

|         | Institution | Freezer name | °C | Container description | Contact person | Email or Phone |
|---------|-------------|--------------|----|-----------------------|----------------|----------------|
| Scute   |             |              |    |                       |                |                |
| Fat     |             |              |    |                       |                |                |
| 3 Liver |             |              |    |                       |                |                |
| Blood   |             |              |    |                       |                |                |
| Brain   |             |              |    |                       |                |                |

## Datasheet for PROTOCOL 3: Necropsies Dead Stranding

Turtle Stranding ID (given by State): \_\_\_\_\_ State: \_\_\_\_\_

Sampling kit number: \_\_\_\_\_

**Blood processing**

| Tube # | Process |
|--------|---------|
| 1      |         |
| 2      |         |
| 3      |         |
| 4      |         |

Fecal sample description \_\_\_\_\_ date shipped \_\_\_\_\_

Parasites collected  
Tissue origin \_\_\_\_\_ Parasite description \_\_\_\_\_ Processing \_\_\_\_\_ date shipped \_\_\_\_\_

**Tissue checklist - Collect tissues that are not 'greyed' out.**

| Tissue              | Histopathology   | Frozen for virus | Toxicology            | Other    |
|---------------------|------------------|------------------|-----------------------|----------|
| Epibiota - carapace |                  |                  |                       |          |
| Epibiota - skin     |                  |                  |                       |          |
| Epibiota - plastron |                  |                  |                       |          |
| Scute scrapings     |                  |                  |                       |          |
| Blood - neck        |                  |                  |                       | genetics |
| Skin                |                  |                  |                       | genetics |
| Fat                 |                  |                  |                       |          |
| Muscle              |                  |                  |                       |          |
| Heart               |                  |                  |                       |          |
| Blood - heart       |                  |                  |                       |          |
| Spleen              |                  |                  |                       |          |
| Liver               |                  |                  | (3)                   |          |
| Gall bladder        |                  |                  |                       |          |
| Bile                |                  |                  |                       | Tom S.   |
| Esophagus           |                  |                  |                       |          |
| Stomach             |                  |                  |                       |          |
| Small intestine     |                  |                  |                       |          |
| Pancreas            |                  |                  |                       |          |
| Colon               |                  |                  |                       |          |
| Kidney              |                  |                  |                       |          |
| Bladder             |                  |                  |                       |          |
| Gonad               |                  |                  |                       |          |
| Trachea             |                  |                  |                       |          |
| Bronchi             |                  |                  |                       |          |
| Lungs               |                  |                  |                       |          |
| Adrenal             |                  |                  |                       |          |
| Brain               |                  |                  |                       |          |
| Bone marrow         | (formalin&slide) |                  | Color of marrow _____ |          |
