# Supplementary material for: Chronic debilitation in stranded loggerhead sea turtles (Caretta caretta) in the southeastern United States: Morphometrics and clinicopathological findings
Source: PLoS One. 2018 Jul 10;13(7):e0200355. doi: 10.1371/journal.pone.0200355 (PMC6039040; doi:10.1371/journal.pone.0200355)
Supplement: S1 Table — (DOC) [file pone.0200355.s004.doc]

Table S1. Morphometric data in debilitated loggerhead sea turtles (*Caretta caretta*) stranded along the southeast U.S. compared to healthy control turtles.

a Each category of turtle was assigned a letter found in brackets in the column headers. DT dead = debilitated turtles that were dead at time of stranding, sample collection at time of stranding; A-died = turtles that died shortly after stranding, sample collection at time of stranding; A-survived = turtles that survived and were released after successful rehabilitation, sample collection at time of stranding; B = sample collection from survivors approximately 1 week after beginning to eat; C = sample collection from survivors approximately 1 to 10 weeks after B sample; D = sample collection from survivors immediately prior to release. H = control turtles that represent apparently healthy turtles.

Statistically significant differences among DT categories are shown in brackets in the sample size rows. NSD = not significantly difference from any turtle category.

Abbreviations: SCL (straight carapace length notch to notch)
